1 **SARS-CoV-2 fears green: the chlorophyll catabolite Pheophorbide a is a potent antiviral.**

2

3 **Authors:** Guillermo H. Jimenez-Aleman<sup>1,a</sup>, Victoria Castro<sup>2,a</sup>, Addis Longdaitsebeher<sup>1</sup>, Marta

4 Gutierrez-Rodríguez<sup>3</sup>, Urtzi Garaigorta<sup>2</sup>, Roberto Solano<sup>1,\*</sup> and Pablo Gastaminza<sup>2\*</sup>.

5

6

7 <sup>1</sup>Department of Plant Molecular Genetics, National Centre for Biotechnology

8 <sup>2</sup>Department of Cell & Molecular Biology, National Centre for Biotechnology

9 <sup>3</sup>Department of Biomimetics for Drug Discovery, Medicinal Chemistry Institute (IQM-CSIC)

10

11

12 <sup>a</sup>These authors contributed equally to the work.

13

14 \*Corresponding authors: Roberto Solano ([rsolano@cnb.csic.es](mailto:rsolano@cnb.csic.es)) and Pablo Gastaminza

15 ([pgastaminza@cnb.csic.es](mailto:pgastaminza@cnb.csic.es))

16

17 **Abstract**

18 The SARS-CoV-2 pandemic is having devastating consequences worldwide. Although  
19 vaccination advances at good pace, effectiveness against emerging variants of the virus is  
20 unpredictable. The virus has displayed a remarkable resistance to treatments and no drugs have  
21 been proved fully effective against Covid-19. Thus, despite the international efforts, there is still  
22 an urgent need for new potent and safe antivirals against SARS-CoV-2. Here we exploited the  
23 enormous potential of plant metabolism, in particular the bryophyte *Marchantia polymorpha*, and  
24 following a bioactivity-guided fractionation and mass-spectrometry approach, identified a potent  
25 SARS-CoV-2 antiviral. We found that the chlorophyll derivative Pheophorbide a (PheoA), a  
26 natural porphyrin similar to animal Protoporphyrin IX, has an extraordinary antiviral activity  
27 against SARS-CoV-2 preventing infection of cultured monkey and human cells, without  
28 noticeable cytotoxicity. We also show that PheoA prevents coronavirus entry into the cells by  
29 directly targeting the viral particle. Besides SARS-CoV-2, PheoA also displayed a broad-  
30 spectrum antiviral activity against (+)strand RNA viral pathogens such as HCV, West Nile, and  
31 other coronaviruses, but not against (-)strand RNA viruses, such as VSV. Our results indicate  
32 that PheoA displays a remarkable potency and a satisfactory therapeutic index, and suggest that  
33 it may be considered as a potential candidate for antiviral therapy against SARS-CoV-2.  
34 Moreover, PheoA adds to remdesivir's efficiency and is currently employed in photoactivable  
35 cancer therapies in humans.

36

37

## 38 **Introduction**

39 The pandemic caused by the severe acute respiratory syndrome coronavirus 2 (SARS-CoV-2) is  
40 having devastating consequences, with more than 196M infected people and over 4M deaths  
41 worldwide (July 2021; <https://covid19.who.int/>). Besides the humanitarian cost, this pandemic  
42 carries a tremendous negative economic impact, a huge challenge for any government to  
43 overcome. The coronavirus disease 2019 (Covid-19), the respiratory illness caused by SARS-  
44 CoV-2 (Genus betacoronavirus; Subgenus sarbecovirus), has displayed a remarkable resistance  
45 to treatments and no drugs have been proved fully effective against the virus. Moreover, the  
46 Covid-19 pandemic has made evident the need for a global strategy to fight similar situations that  
47 may appear in the future.

48 Current efforts to eradicate Covid-19 are focused on the development of vaccines and the search  
49 for antiviral lead compounds, mainly repurposing of existing drugs. Although the vaccination  
50 campaign seems to advance at good pace, its effectiveness against some of the present and future  
51 strains of SARS-CoV-2 is hard to predict due to the existence of different strains that could  
52 drastically reduce the vaccine efficiency<sup>1</sup>. In addition, the best anti-Covid-19 drugs approved so  
53 far (e.g. Remdesivir, Favipiravir or its derivative Avifavir, etc), have shown only a mild effect  
54 against the virus, slightly reducing hospitalization time of patients<sup>2</sup>. Other treatments, such as  
55 Chloroquine and Hydroxychloroquine appear to help at least a subgroup of patients, but, possible  
56 negative side effects of these drugs remain under investigation<sup>3</sup>. Although, some compounds  
57 (e.g., Aplidin, Mefloquine, Nelfinavir, Protoporphyrin IX and Verteporfin) have shown potential  
58 on *in vitro* assays, and some of them also in animal models<sup>4-6</sup>, there is an urgent need for new  
59 potent and safe antivirals against SARS-CoV-2. Noteworthy, new pathogens, including viruses,  
60 are expected to emerge in coming decades, which puts an enormous pressure on society in order  
61 to be ready to fight back future pandemics with the proper chemical, biological, and engineering  
62 tools, including effective new antivirals.

63 For centuries, medical needs of society have been widely covered by plants, which have an  
64 extremely rich metabolism that provides them with a wide repertoire of chemical weapons to  
65 cope with environmental biotic stresses, including viruses<sup>7,8</sup>. Originally recognized by traditional  
66 medicine, plants are the main source of compounds used today in pharmacology, from Aspirin  
67 (acetyl salicylate; from *Salix* sp.) to current anticancer drugs (e.g. Vinblastine and Vincristine  
68 from *Vinca* sp., or Taxol and Paclitaxel from *Taxus baccata*), simply to cite a few successful  
69 examples<sup>9,10</sup>. Therefore, the identification of new plant sources of enzymatic variants and  
70 metabolites is essential to the discovery of new drugs and their optimization by metabolic  
71 engineering. Aromatic and exotic vascular plants are commonly studied in order to identify  
72 pharmacologically interesting compounds. In contrast, the metabolic richness of bryophytes  
73 (non-vascular plants including mosses, liverworts and hornworts) has been little explored.  
74 Bryophytes are rarely attacked by pathogens (fungi, bacteria, viruses) or herbivores (insects,  
75 snails, mammals) in their natural habitats, which indicates that they are well protected by a potent  
76 arsenal of secondary defense metabolites. However, studies on their chemical constituents have  
77 been neglected until recently<sup>11</sup>. Indeed, only around 5% of bryophyte species have been  
78 metabolically explored, and results have shown an enormously rich diversity of secondary  
79 metabolites, particularly in liverworts<sup>12</sup>. Strikingly, more than 1600 terpenoids have been reported  
80 in liverworts, whereas only about 100 terpenoids have been identified in the medicinal plant  
81 *Cannabis sativa*<sup>11,13-16</sup>. More importantly, several liverwort species of the order Marchantiales,  
82 including *Marchantia polymorpha*, produce terpenoids and bisbibenzyls with enormous potential  
83 for pharmaceutical applications since they show remarkable antimicrobial, antioxidant, cytotoxic,  
84 anticancer and antiviral (anti-HIV) activities<sup>11,13,15-18</sup>. Therefore, we made use of our vast  
85 experience in vorology and *Marchantia*'s hormonal signaling and secondary metabolism in order  
86 to explore this plant's potential as a source of antiviral metabolites, particularly, against the  
87 SARS-CoV-2 virus.

88 In this study, we employed a set of *Marchantia* wild type plants, and signalling and metabolic  
89 mutants to systematically study the pharmacological potential of this liverwort. We found that  
90 total extracts from all the plants displayed a remarkable antiviral activity against SARS-CoV-2.  
91 Using a bioactivity-guided chromatographic approach, in addition to mass-spectrometry (MS),  
92 we identified the antiviral metabolite as Pheophorbide a (PheoA), a porphyrin chlorophyll  
93 derivative very similar to animal Protoporphyrin IX, also described as an strong antiviral. In  
94 contrast to Protoporphyrin IX, however, which produces prophyria in humans, PheoA is non  
95 toxic. We also found that PheoA has a broad-range antiviral activity against positive strand RNA  
96 (+RNA) viruses and acts as a virucidal, by directly acting on the viral particle. PheoA is additive  
97 to remdesivir, which, together with its low toxicity, suggest its potential as candidate for antiviral  
98 therapy against SARS-CoV-2.

99

## 100 **Results**

### 101 *Crude extracts of M. polymorpha show anti-SARS-CoV-2 activity*

102 In order to explore for the presence of anti-SARS-CoV-2 metabolites in *M. polymorpha*, we  
103 prepared crude extracts of two different *M. polymorpha* subspecies, (subsp. *ruderalis* from Japan  
104 and subsp. *polymorpha*, from Spain). The anti-SARS-CoV-2 activity of the resulting crude  
105 extracts was tested in Vero-E6 cell monolayers infected with the SARS-CoV-2 NL2020 strain  
106 (Figure 1). Infection was carried out at a multiplicity of infection (MOI) of 0.001 for 72 h. In the  
107 absence of antiviral activity, SARS-CoV-2 infection triggers cell death of Vero E6 cells and  
108 results in loss of cell biomass, which is readily visualized as a strong reduction in crystal violet  
109 staining in the well (DMSO, Figure 1). Treatment of the cells during infection with serial dilutions  
110 of remdesivir (used as positive control), the only clinically approved antiviral for treatment of  
111 Covid-19 patients, protected the cell monolayers down to its reported EC<sub>50</sub> of 1.5 μM (Figure  
112 S1). Similarly, treatment of cell cultures with *Marchantia* crude extracts resulted in cell protection

113 against virus-induced cytopathic effect without any signs of cytotoxicity in a broad dilution range  
114 (Figure 1A, Ex1 and Ex2), suggesting the presence of one or more *Marchantia* metabolites with  
115 strong antiviral activity.

116 Given that antiviral activity had been determined by an indirect measurement (Figure 1B), we set  
117 out to define if *Marchantia* extracts were indeed capable of interfering with viral spread in cell  
118 culture. Thus, Vero E6 cells were inoculated at MOI of 0.001 in the presence of control-solvent,  
119 remdesivir (6.25 or 25  $\mu$ M) and a 1:800 (v/v) dilution of the *Marchantia* extracts. Viral RNA  
120 load, which in this experimental setup represents the degree of virus propagation, was determined  
121 72 h post infection by RT-qPCR (Figure 2). In the control, viral RNA accumulated six orders of  
122 magnitude above the assay background levels, whereas the viral RNA was undetectable in  
123 samples treated with the antiviral remdesivir. Importantly, in samples treated with *Marchantia*  
124 extracts, the viral RNA levels were comparable to those observed upon remdesivir treatment  
125 (Figure 2). This outcome confirms the protective activity of the extracts observed in Figure 1 and  
126 suggest the presence of at least one antiviral compound.

127 ***Extract bioactivity does not depend on plant's secondary metabolism and is common to several***  
128 ***plant species***

129 Next, we explored whether the putative antiviral metabolite could belong to plant's secondary  
130 metabolism. Jasmonates (JAs) are a family of oxylipin-derived phytohormones regulating many  
131 aspects of plant development and growth; as well as mediating defense responses through  
132 transcriptional activation of the secondary metabolism, which includes several classes of  
133 compounds such as alkaloids, terpenoids and flavonoids <sup>19-21</sup>. In *Marchantia*, secondary  
134 metabolites accumulate in specific organelles named oil bodies (OB), which are confined to  
135 scattered idioblastic OB cells distributed throughout the thallus <sup>22</sup>. Therefore, we tested extracts  
136 from *M. polymorpha* WT, *Mpcoi1-2* [impaired in dn-OPDA perception, the active JA in  
137 *Marchantia* <sup>21</sup>, thus, in defense metabolite induction], and *Mpc1hdz* plants (impaired in OB

138 formation; MpC1HDZ is a transcription factor required for OB cells differentiation). *Mpc1hdz*  
139 mutants render plants defective in secondary metabolites, thus, susceptible to herbivory and  
140 microbes<sup>23</sup>. To our surprise, all *Marchantia* extracts, WT or mutant, showed similar antiviral  
141 activity (Figure 3), indicating that the active antiviral should not belong to the plants's secondary  
142 metabolism. Indeed, data in Figure 3 suggests that the activity of extracts is due to the presence  
143 of a metabolite (or metabolites) that is constitutively synthesized and/or derived from the plant's  
144 primary metabolism. Remarkably, regulation of primary metabolism is achieved in all plants by  
145 very similar conserved metabolic pathways<sup>24,25</sup>. Therefore, we tested crude extracts of several  
146 plant species [sweet amber (*Hypericum androsaemum*), fern (*Blechnum spicant*), nettle (*Urtica*  
147 *dioica*), moss (*Physcomitrium patens*), tobacco (*Nicotiana benthamiana*) and thale cress  
148 (*Arabidopsis thaliana*)] for their capability of providing protection to Vero E6 cells against the  
149 SARS-CoV-2 virus. As shown in Figure S2, certain degree of protection was observed for most  
150 of the tested plant species; the clearest protecting activity was observed for *Marchantia* crude  
151 extracts.

### 152 ***Identification of the antiviral metabolite***

153 In order to identify the bioactive metabolite(s), we followed a *bioactivity-guided*  
154 *chromatographic fractionation* of the *Marchantia*'s WT crude extracts, which showed strong  
155 antiviral effect in previous assays. Chromatographic fractions were obtained via flash column  
156 employing a solvent polarity gradient, starting at *n*-hexane (100%) up to AcOEt:MeOH (4:1, v/v).  
157 A total of 56 fractions were obtained; fractions of a similar composition, based on their thin layer  
158 chromatography (TLCs) profiles, were combined and evaluated as 12 new pooled fractions (1-  
159 12). Fractions 10, 11 and 12 showed antiviral activity in the monolayer protection assay (Figure  
160 4A-B). To directly confirm their antiviral activity, the viral antigen load reduction after  
161 inoculation of cell cultures with SARS-CoV-2 (MOI = 0.01) was measured. In this experimental  
162 setup, viral antigen accumulates as a consequence of virus propagation and can be quantitated

163 using automated immunofluorescence microscopy. Figure 4C shows a dose-dependent reduction  
164 of viral antigen accumulation and the absence of cytotoxicity, as confirmed by normal cell  
165 numbers, estimated by DAPI staining and image analysis, and cell viability studies performed in  
166 parallel, uninfected cultures by MTT assays (Figure 4C).

167 Interestingly, TLCs of the three active fractions presented red fluorescent spots (under long wave  
168 ultraviolet light, 365 nm; Supplementary Figure S3A), which are characteristic of plant  
169 chlorophylls, but with a smaller retention factor [ $R_f = 0.36$ , AcOEt:MeOH (9:1, v/v)] than that  
170 of chlorophyll ( $R_f = 0.92$ ). At this point, we suspected that the active antiviral metabolite(s) could  
171 be related to plant chlorophylls, especially because a weak antiviral activity was observed at low  
172 dilutions of fractions 2 and 3 (Figure 4A), both containing chlorophyll. Indeed, these fractions,  
173 when re-chromatographed, yielded spots on the TLC with an  $R_f$  consistent with that observed in  
174 the active fractions 10 to 12, indicating that the active metabolite is a chlorophyll derivative  
175 (Supplementary Figure S3B). It is worth mentioning that heat notably accelerated the chlorophyll  
176 decomposition into the investigated metabolite.

177 Next, we employed preparative TLC in order to better isolate and characterize the red-light  
178 emitting metabolite. Photosynthetic metabolites were extracted from *M. polymorpha* WT and  
179 *Mpc1hdz* plants, and the extracts subjected to preparative TLC. Three spots showed fluorescence  
180 in the vicinity of the expected  $R_f$ ; these spots were isolated, analysed by HPLC-UV-MS and the  
181 bioactivity assayed as fractions C, D and E (Figure 5A). Fraction D showed the strongest antiviral  
182 activity (Figure 5B), which corresponded with an enrichment of compound **1** in the UV  
183 chromatograms (Figure 5C). Careful analysis of the MS spectra (positive mode) revealed a  
184 molecular formula of  $C_{35}H_{36}N_4O_5$  for compound **1**, as deduced by HR-ESI<sup>+</sup>-MS from its  
185 monoprotonated molecular ion,  $[M+H]^+$ , with a  $m/z$  of 593.2759. The identified molecular  
186 formula (containing four nitrogen atoms), the exact mass and the characteristic red fluorescence  
187 of the compound helped to identify **1** as the chlorophyll catabolite *Pheophorbide a* (PheoA,



188 Figure 5C). The identity of PheoA was further confirmed by comparison with both a  
189 commercially available original standard (Santa Cruz Biotechnology) and a semisynthetic  
190 sample. PheoA was obtained semi-synthetically from *Marchantia* in good overall yield via a  
191 solvent-free, thus, environmentally friendly method (Supp. Figure S4 and M&M section).

### 192 **Antiviral activity of PheoA.**

193 To confirm the antiviral potential of PheoA, a commercially available PheoA stock solution was  
194 serially diluted and mixed with a virus stock to inoculate Vero E6 and Huh7-ACE2 cells (human  
195 hepatoma cells expressing ACE2). Cells were fixed 72 h post-inoculation and stained with crystal  
196 violet to visualize the integrity of the cell monolayer. Figure S5 shows consistent protective  
197 capacity of PheoA at concentrations above 40 ng/ml (67 nM) in both cell lines.

198 PheoA antiviral activity was further confirmed by immunofluorescence microscopy, to estimate  
199 virus propagation, and an MTT assay to evaluate compound cytotoxicity. PheoA dose-response  
200 curves demonstrate PheoA's antiviral activity against SARS-CoV-2 in Vero E6 and human lung  
201 epithelial cells (A549-ACE2 and Calu3); in all three models, no cytotoxicity was observed  
202 (Figure 6). This dataset was used to determine effective concentrations ( $EC_{50}$  and  $EC_{90}$ ) and  
203 cytotoxicity indexes. The estimated  $EC_{50}$  and  $EC_{90}$  values were around 14 ng/mL (25 nM) and  
204 156 ng/mL (86 nM), with a wide therapeutic window in all tested cell lines (Table 1).

**Table 1: Potency and cytotoxicity indexes of commercially available PheoA**

| Cell line              | $EC_{50}$ (nM) | $EC_{90}$ (nM) | $CC_{50}$ (nM) |
|------------------------|----------------|----------------|----------------|
| Vero-E6 (green monkey) | 25             | 86             | >8420          |
| A549-ACE2 (human lung) | 52             | 263            | 2020           |
| Calu3 (human lung)     | 34             | 232            | >8420          |

205 To fully evaluate the extent to which PheoA interferes with SARS-CoV-2 infection (i.e. on viral  
206 replication) – given the narrow dynamic range of immunofluorescence –, we employed RT-qPCR  
207 to determine the extracellular viral RNA load in human cells inoculated with SARS-CoV-2 (MOI

208 = 0.001). In this experimental setup, remdesivir (5  $\mu$ M) reduced extracellular viral RNA by three  
209 orders of magnitude. Interestingly, PheoA significantly reduced viral spread even at the lowest  
210 tested concentration (150 ng/mL; 0.25  $\mu$ M), as shown by the three times log reduction in viral  
211 RNA accumulation after a 48 h incubation period (Figure 7). These results indicate that PheoA  
212 displays a remarkable potency and a satisfactory therapeutic index, and suggest that it may be  
213 considered as a potential candidate for antiviral therapy against SARS-CoV-2. Furthermore,  
214 results also suggest that PheoA is a major determinant of the antiviral activity observed in crude  
215 *Marchantia* extracts (Figure 1). This notion is underscored by the fact that the semisynthetic  
216 PheoA (88-94% by HPLC-UV/Vis) showed comparable potency to crude extracts in the different  
217 cell lines (Figure S6). Nevertheless, other related chlorophyll metabolites may also contribute  
218 with antiviral activity. In fact, pyropheophorbide a (pPheoA), which was also found in antiviral  
219 fractions was tested to verify its antiviral potential in Vero-E6 cells. The pPheoA showed antiviral  
220 activity in the absence of measurable cytotoxicity with an EC<sub>50</sub> of 185 nM (Figure S7), suggesting  
221 lower potency than PheoA and further underscoring a major role for PheoA in the antiviral  
222 activity of *Marchantia* extracts.

### 223 **Antiviral spectrum of Pheophorbide A**

224 PheoA has previously been proven as an antiviral against the hepatitis C virus (HCV)<sup>26</sup> and  
225 virucidal against herpes simplex virus (HSV)<sup>27</sup>. Thus, we determined the antiviral spectrum of  
226 PheoA on different enveloped +RNA viruses. First, we confirmed antiviral activity against HCV,  
227 using a surrogate model of infection by propagation-deficient, *bona fide* reporter virus bearing a  
228 luciferase reporter gene generated by trans-complementation (HCVtcp). Dose-response curves of  
229 the luciferase activity in HCVtcp-infected Huh7 cells indicated an EC<sub>50</sub> of 177 ng/mL (300 nM)  
230 for PheoA against HCV (Figure 8A), very similar to the previously reported EC<sub>50</sub><sup>26</sup>.  
231 Next, we asked whether PheoA antiviral activity against SARS-CoV-2 could also be observed  
232 against other human coronaviruses such as hCoV-229E (Genus alphacoronavirus; Subgenus

233 Duvinecovirus), which has been associated with mild respiratory infections<sup>28</sup>. Huh7 cells were  
234 inoculated (MOI = 0.01) and total GFP expression in the target Huh7 cells was evaluated by  
235 automated microscopy 48 h post-inoculation. Similar to the results with the HCV infection model,  
236 PheoA reduced viral spread (EC<sub>50</sub> of 76 ng/mL; 128nM) while no cytotoxicity was observed  
237 (Figure 8B). Strikingly, comparable results were obtained in an experimental model of infection  
238 by the West Nile Virus, a mosquito-borne zoonotic pathogen that may cause encephalitis in  
239 infected humans. A recombinant, di-cistronic infectious molecular clone expressing GFP in the  
240 second cistron<sup>29</sup> was used to inoculate Huh7 cells (MOI = 0.01). Cells were imaged 48 h post  
241 infection and the degree of virus propagation was determined via automated microscopy; dose  
242 response curves (Figure 8) indicated antiviral activity for PheoA with an EC<sub>50</sub> of 38 ng/mL (68  
243 nM). Altogether, these results suggest that PheoA displays a broad-spectrum antiviral activity  
244 against +RNA viral pathogens. In view of these results, we decided to test PheoA antiviral activity  
245 against the vesicular stomatitis virus (VSV), a negative-strand RNA (-RNA) virus. Dose-response  
246 experiments, similar to those describe above, were performed employing A549-ACE2 cells.  
247 Interestingly, the VSV-GFP<sup>30</sup> was not susceptible to PheoA doses largely exceeding those for  
248 which antiviral activity was observed against SARS-CoV-2 (Figure 8D). Collectively, these  
249 results suggest that PheoA is a broad-spectrum antiviral and that +RNA viruses are particularly  
250 susceptible.

### 251 **Pheophorbide a can be employed in combination with remdesivir.**

252 Once the broad antiviral activity of PheoA has been demonstrated, we studied, in several infection  
253 systems, whether the addition of PheoA to remdesivir treatment could result in a synergistic effect  
254 on viral infection. Thus, combination treatments were performed with increasing doses of PheoA  
255 and remdesivir. Drugs were mixed in different proportions, combined with infectious SARS-  
256 CoV-2 (MOI = 0.01) and the mixtures were used to inoculate Vero E6 cells. Twenty-four hours  
257 later, cells were fixed and processed to determine the infection efficiency as described in Figure

258 6. Individual treatment with either compound resulted in the expected dose-dependent inhibition  
259 of virus infection, achieving the EC<sub>50</sub> at the expected doses (2000 nM for remdesivir and 40 nM  
260 for PheoA). Increasing concentrations of PheoA improved remdesivir efficacy and viceversa.  
261 However, full analysis of the combinations resulted in a synergy index close to three, indicating  
262 that the drug combination is mostly additive<sup>31</sup>, with an area of synergy at concentrations close to  
263 the EC<sub>50</sub>s (Figure 9). These results suggest that combinations of PheoA with other antivirals may  
264 result beneficial, as it was observed by its additive effect in combination with remdesivir in cell  
265 culture infection models.

### 266 **Characterization of Pheophorbide a mode of action on SARS-CoV-2 infection.**

267 Next, antiviral efficacy of PheoA was compared when PheoA was (i) present at all times, (ii)  
268 added only during virus inoculation, or (iii) added only after virions had effectively penetrated  
269 the cells in single-cycle infection experiments (MOI = 5). Imatinib, for which antiviral activity at  
270 the level of virus entry has previously been demonstrated<sup>32</sup>, was employed as the reference  
271 compound. Infection efficiency revealed the expected antiviral activity for imatinib and PheoA  
272 when maintained at all times in the experiment (Figure 10). Imatinib showed comparable efficacy  
273 when added during the virus entry phase and greatly lost efficacy when added after virion  
274 internalization, as expected for an entry inhibitor. Similar results were obtained with PheoA,  
275 inhibition was nearly identical when maintained at all times or added during viral entry, but only  
276 ca. 6% of the maximum efficacy (statistically significantly different though) was observed when  
277 added after virion internalization. These results suggest that PheoA is mainly acting at early  
278 stages of the infection, potentially at the level of viral entry.

279 In view of these results, we directly tested this hypothesis by determining the antiviral activity of  
280 PheoA in a surrogate model of infection recapitulating only aspects related with viral entry such  
281 as receptor recognition, virion internalization or membrane fusion. This system is based on  
282 reporter retroviral vectors pseudotyped with SARS-CoV-2 Spike protein (Spp) or VSV

283 glycoprotein as a control (VSVpp). Infection efficiency in the presence of antiviral molecules is  
284 determined as the relative expression values of the reporter gene, in this case a Firefly luciferase<sup>32</sup>.  
285 Relative infection efficiency was measured in the presence of the entry inhibitor imatinib (15  
286  $\mu\text{M}$ ) and antiviral doses of PheoA. As expected, imatinib selectively inhibited Spp and not  
287 VSVpp entry (Figure 11). PheoA barely interfered with either retroviral pseudotype infection  
288 efficiency, with a maximum reduction of 40% at the maximum dose (400 ng/ml; 678 nM) (Figure  
289 11). These results suggest that, while time-of-addition experiments suggest that PheoA interferes  
290 predominantly with early aspects of the infection, surrogate models of viral entry indicate that it  
291 does not interfere substantially with molecular events leading to viral entry *per se*.

292 PheoA irreversibly interferes with the virion infectivity in HSV and influenza infection models<sup>27</sup>,  
293 therefore, we explored whether PheoA could be virucidal for SARS-CoV-2 virions, a property  
294 that would be compatible with the observations made in the time-of-addition experiments. Thus,  
295 a known number of infectious particles ( $10^5$  TCID<sub>50</sub>) were mixed with increasing doses of PheoA  
296 [8 ng/mL(0.014  $\mu\text{M}$ ) to 5000 ng/mL (8.45  $\mu\text{M}$ )] and incubated for 30 minutes before residual  
297 infectivity titer determination by endpoint dilution and TCID<sub>50</sub> determination. The dose of PheoA  
298 was kept below its effective concentrations during the titration experiment. Figure 12 shows how  
299 pre-incubation of the infectious virions with PheoA (40 ng/mL or more) resulted in irreversible,  
300 dose-dependent inactivation of the virus infectivity. These results suggest that PheoA is virucidal  
301 for SARS-CoV-2 virions and that virion infectivity inactivation contributes to its overall antiviral  
302 effect.

### 303 **Discussion**

304 Due to their metabolic richness plants have been traditionally used as source of medicines. The  
305 potential of plant metabolites in pharmacology is still far from being saturated, particularly in  
306 certain plant clades. Indeed, bryophytes (non-vascular plants) are particularly rich in specialized  
307 metabolites that are rarely found in other plant lineages<sup>33</sup>. Here, we explored this richness in

308 order to find antiviral compounds against the SARS-CoV-2 virus by employing an activity-  
309 guided chromatographic method; and identified PheoA as a potent antiviral, very efficient not  
310 only against SARS-CoV-2 but also against several other enveloped viruses.

311 The first evidence for antiviral activity of PheoA derives from observations made on HSV  
312 infection models<sup>34</sup>. In those initial reports, some degree of selectivity towards other viruses was  
313 reported, since adenovirus (Type VI), Japanese Encephalitis virus (JEV) or poliovirus were not  
314 affected by treatment with PheoA-enriched algal extracts<sup>35</sup>. Subsequent studies suggested that  
315 PheoA and pPheoA display broad-spectrum antiviral activity against enveloped viruses,  
316 including influenza A<sup>27</sup> and HIV<sup>36</sup>, but not against non-enveloped viruses<sup>27</sup>. Ohta et al. reported  
317 that PheoA-containing preparations may display virucidal activity against HSV<sup>35</sup>, a concept that  
318 was further supported by Bouslanu et al.<sup>27</sup>. Our observations support that PheoA inactivates  
319 SARS-CoV-2 (enveloped +RNA virus) virion infectivity through a virucidal mode of action.  
320 First, time-of-addition experiments indicate that early aspects of the infection are targeted by  
321 PheoA. Second, the study of viral entry using retroviral pseudotypes did not reveal any  
322 measurable antiviral activity against SARS-CoV-2 entry, suggesting that receptor recognition by  
323 the Spike protein, particle internalization and Spike-mediated fusion are not affected by PheoA.  
324 Similar models have been used to identify key SARS-CoV-2 entry factors as well as to study  
325 antibody neutralizing activity. Thus, irreversible inactivation of viral infectivity (virucidal  
326 activity) was tested as a possible mechanism reconciling these apparently contradicting  
327 observations. Pre-incubation of infectious SARS-CoV-2 virions with PheoA rendered the virions  
328 non-infectious even when PheoA-virus dilutions were performed below active PheoA  
329 concentrations. The virtual lack of activity of PheoA at post-entry levels may be explained by the  
330 fact that PheoA can only act on the viral particle, or, that PheoA requires longer incubation  
331 periods to penetrate the cell and interfere with downstream steps of the virus lifecycle. Given that  
332 overall effectiveness of PheoA as virucidal is substantially stronger than during multiple cycle

333 infection experiments, it is likely that virucidal activity is the main mechanism for interference  
334 with SARS-CoV-2 infection.

335 PheoA has been shown to integrate into biological membranes<sup>37</sup>. Thus, it is possible that PheoA  
336 could insert into the viral envelope lipid bilayer, altering its biophysical properties, or even  
337 disrupting it, thus rendering the virion non-infectious. This would explain PheoA's virucidal  
338 activity and its broad-spectrum among enveloped viruses. However, some degree of selectivity  
339 was observed since PheoA doses that completely abolished infection by several +RNA viruses  
340 did not interfere with VSV or retroviral pseudotype (both also enveloped) infection. It likely is  
341 possible that the membrane's lipidic composition could play a key role for PheoA incorporation.  
342 In this sense, VSV and retroviral pseudotypes are assembled at the plasma membrane<sup>38,39</sup>, while  
343 the rest of the tested virus particles are assembled in intracellular compartments<sup>40,41</sup>, which display  
344 a very different membrane composition from that of the plasma membrane<sup>42</sup>.

345 On the other hand, PheoA is a plant derived porphyrin closely related to animal porphyrins, which  
346 have been widely described as broad-spectrum virucidals (reviewed in Sh. Lebedeva et al.<sup>43</sup>).  
347 Virion inactivation is thought to occur through incorporation of porphyrins into the viral envelope  
348 membrane and modifying its physico-chemical properties, thus interfering with host cell  
349 recognition and fusion processes. However, porphyrins such as protoporphyrin IX display  
350 antiviral activity independently of their virucidal activity at post-entry steps and have been  
351 proposed to interfere with receptor (ACE2) recognition in SARS-CoV-2 infection models<sup>44</sup>. The  
352 structural resemblance between PheoA and proporphyrin IX may explain their similar antiviral  
353 properties (broad spectrum and virucidal), but, at the same time, their differences may contribute  
354 to PheoA's increased tolerability and *in vivo* effectiveness, an issue that has extensively been  
355 explored for different PheoA applications as photosensitizer in photodynamic therapies against  
356 cancer <sup>45,46</sup>.

357 One huge advantage of PheoA is that it is readily available from plant and algae chlorophyll.  
358 PheoA is the dephytylation and demetallation product of chlorophyll *a*, processes mediated by  
359 chlorophyllase and Mg-dechelataase, respectively<sup>47,48</sup>. Chlorophyllase activity is favored by high  
360 temperatures (60-80 °C)<sup>47</sup> and its accumulation varies throughout plant development and in stress  
361 conditions. In this study, we also exploited stress conditions (heat) that favour PheoA  
362 accumulation and PheoA was semisynthetically prepared from *M. polymorpha* in good overall  
363 yield.  
364 Another advantage of PheoA is that its combination with remdesivir has an additive effect with  
365 no cross inhibition in their antiviral activity, and a mild synergy. This, together with its low  
366 toxicity *in vivo*, represents an advantage that could be clinically exploited<sup>49</sup>.

## 367 **Materials and Methods**

### 368 *Equipment and reagents*

369 All solvents were of ACS quality unless stated otherwise. Commercially available PheoA was  
370 purchased from Santacruz Biotechnology (>90% by HPLC). A Geno Grinder Spex/SamplePrep  
371 2010 was employed for tissue homogenization. Glass or aluminium supported Silica gel 60  
372 (Merck) was used for preparative and analytical TLCs, respectively; for flash column  
373 purification, silica gel 60 Å, 230-400 mesh, 40-63 µm was employed. HPLC-UV-MS analysis  
374 was carried out by using a Waters Separations module Alliance e2695 system, a Waters QDa  
375 Detector Acquity QDa and a Waters Photodiode Array Detector 2996. HPLC was performed by  
376 using a Sunfire C18 (4.6 × 50 mm, 3.5 µm) column at 30 °C, with a flow rate of 1 mL/min and  
377 a mobile phase gradient from 70 to 95 of A (formic acid 0.1% in CH<sub>3</sub>CN) in B (0.1% of formic  
378 acid in H<sub>2</sub>O) for 10 minutes. Electrospray in positive mode was used for ionization. The HR-  
379 MS analysis was carried out by using an Agilent 1200 Series LC system (equipped with a  
380 binary pump, an autosampler, and a column oven) coupled to a 6520 quadrupole-time of flight  
381 (QTOF) mass spectrometer. CH<sub>3</sub>CN:H<sub>2</sub>O (75:25, v/v) was used as the mobile phase at 0.2



382 mL/min. The ionization source was an ESI interface working in the positive-ion mode. The  
383 electrospray voltage was set at 4.5 kV, the fragmentor voltage at 150 V and the drying gas  
384 temperature at 300 °C. Nitrogen (99.5% purity) was used as nebulizer (207 kPa) and drying gas  
385 (6 L/min). The scan range was 50–1100 m/z.

#### 386 ***Preparation of crude *M. polymorpha* extracts***

387 Plant material (10 g, fresh weight) was collected and dried in an oven (60 °C) until constant  
388 weight. The dry tissue was ground to a fine powder using a Geno/Grinder (2x 2 min at 2700  
389 rpm) and extracted two times at room temperature with 30 mL of CHCl<sub>3</sub>:MeOH (2:1, v/v) for at  
390 least 6 h each time. Extracts were combined and concentrated under a nitrogen flow. The  
391 remaining solid was dissolved in DMSO (1 mL) to create the stock solutions employed in the  
392 bioassays.

#### 393 ***Chromatographic fractionation of extracts***

394 Plants extracts were prepared as described above starting from ca. 20 g of plant material and  
395 directly subjected to silica gel flash column chromatography employing a solvent polarity  
396 gradient starting at *n*-hexane (100%) up to AcOEt:MeOH (4:1, v/v). A total of 56 metabolite-  
397 enriched fractions were obtained. Fractions were analyzed by TLC and those of similar  
398 composition were combined to render 12 new pooled fractions, which were screened for  
399 antiviral activity.

#### 400 ***Preparative TLCs***

401 Photosynthetic metabolites were extracted [two times, o/n, acetone (30 mL)] from fresh, finely  
402 grounded *M. polymorpha* thallus (ca. 40 g). The combined extracts were concentrated to a final  
403 volume of 10 mL, centrifuged (4000 rcf), filtrated (45 µm, Whatmann PTFE filters) and  
404 chromatographed on preparative TLC plates employing the solvent system AcOEt:MeOH (9:1,  
405 v/v).<sup>1</sup> Selected fluorescent spots (C, D and E) were scraped off, eluted (AcOEt:MeOH, 4:1, v/v)

<sup>1</sup> The TLC was heated (heat gun) vigorously at the extract application point before being developed; this procedure enhances Chlorophylls conversion into PheoA.

406 and dried under a nitrogen stream. Single components (C, D and E) were prepared at a 10  
407 mg/mL and submitted to both antiviral assays, as described below, and HPLC-UV-MS analysis  
408 as described above.

#### 409 ***Semisynthetic preparation of PheoA***

410 Fresh *M. polymorpha* thallus (ca. 50 g) was oven dried to produce ca. 3.5 g of dry material,  
411 which was ground to a fine powder in the GinoGrinder as described above. The obtained  
412 powder (3 g) was extracted (3x, Acetone, 90 mL), the extracts combined and silica gel (6 g,  
413 ratio 2:1 by weight relative to the dried leaf powder) added. The solvent was evaporated under  
414 reduced pressure to produce an impregnated silica, which was heated (60 °C) overnight to  
415 further potentiate PheoA production. The obtained silica was directly loaded into a flash  
416 column that was run as follows: column ID = 3 cm, silica (70 g), *n*-hexane:AcOEt (1:1, 300  
417 mL), AcOEt:MeOH (9:1, 300 mL; 4:1, 600 mL; 7:3, 300 mL), fractions of ca. 35 mL were  
418 collected. Fractions were analyzed by TLC and the obtained PheoA (3.9 mg, 0.13 % from oven  
419 dried leaf material).

#### 420 ***Cell culture***

421 Vero E6 (ATCC) and Calu3 (ATCC) cell lines were kindly provided by Dr. Enjuanes (CNB-  
422 CSIC). A549 cells were kindly provided by Dr. Juan Ortín (CNB-CSIC) and Huh7 cells were  
423 kindly provided by Dr. Chisari (TSRI, La Jolla). A549 and Huh7 cells were transduced with a  
424 retroviral vector enabling expression of ACE2 in a di-cistronic expression cassette also conferring  
425 resistance to blasticidine. Transduced populations were selected using 2.5 µg/mL of blasticidine.  
426 All cell cultures were kept in complete media (DMEM) supplemented with 10 mM HEPES, 1X  
427 non-essential amino acids (gibco), 100 U/mL penicillin-streptomycin (GIBCO) and 10% fetal  
428 bovine serum (FBS; heat-inactivated at 56 °C for 30 min). Unless otherwise stated, all infection  
429 experiments were performed at 37°C in a CO<sub>2</sub> incubator (5% CO<sub>2</sub>) the presence of 2% FBS and  
430 in the absence of selection antibiotics.

431 ***Viruses***

432 SARS-CoV-2 (Orthocoronavirinae; Alphacoronavirus; Sarbecovirus; strain NL/2020) was  
433 kindly provided by Dr. R. Molenkamp, Erasmus University Medical Center Rotterdam. SARS-  
434 CoV2 stocks were produced and titrated in VeroE6 cells as described previously (PMID  
435 33917313). VSV-GFP<sup>30</sup> was kindly provided by Dr. Rodriguez (CNB-CSIC). WNV-GFP  
436 recombinant virus was rescued from cloned cDNA as reported previously<sup>29</sup>. Trans-complemented  
437 defective reporter HCV virions (HCVtcp) were produced as described in (Steinmann et al.,  
438 2008)<sup>50</sup>. The hCoV-229E-GFP<sup>51</sup> was kindly provided by Dr. Thiel (University of Basel) and  
439 propagated in Huh7 cells at 33°C in a controlled 5% CO<sub>2</sub> environment.

440 ***Cytopathic effect protection assays in Vero E6 and Huh7-ACE2 cells***

441 Vero E6 or Huh7-ACE2 cell monolayers were inoculated (MOI = 0.001) in the presence of a  
442 wide range of two-fold dilutions of the crude, or partially purified extracts, or pure compounds  
443 and incubated for 72 h. Cytopathic effect and lack thereof was visualized by crystal violet  
444 staining, as previously described<sup>32</sup>. Untreated and solvent-treated cells were included in each plate  
445 as controls.

446 ***Evaluation of the antiviral activity by immunofluorescence microscopy***

447 Vero E6, A549-ACE2 or Calu3 were seeded onto 96-well plates as described above and infected  
448 in the presence of the indicated compound dose (MOI = 0.01). Twenty-four hours post infection  
449 (48 h for Calu3 cells), cells were fixed for 20 minutes at room temperature with a 4%  
450 formaldehyde solution in PBS, washed twice with PBS and incubated with incubation buffer (3%  
451 BSA; 0.3% Triton X100 in PBS) for 1 h. A monoclonal antibody against the N protein was diluted  
452 in the incubation buffer (1:2000, v/v; Genetex HL344) and incubated with the cells for 1 h; after  
453 this time, cells were washed with PBS and subsequently incubated with a 1:500 (v/v) dilution of  
454 a goat anti-rabbit conjugated to Alexa 488 (Invitrogen-Carlsbad, CA). Nuclei were stained with  
455 DAPI (Life Technologies) as recommended by the manufacturer during the secondary antibody

456 incubation. Cells were washed with PBS and imaged using an automated multimode reader  
457 (TECAN Spark Cyto; Austria).

458 All the infection experiments were performed by mixing the virus and compound dilutions 1:1  
459 (v/v) before addition to the target cells. In the time-of-addition experiments, Vero E6 cultures  
460 were inoculated (MOI from 0.5-1) for 1 h in the presence or absence of the compounds at 37 °C.  
461 Subsequently, virus-compound mixtures were left at all times, or removed and replaced with fresh  
462 2% FBS complete media containing or not the tested compounds (see experimental scheme in  
463 Figure X for details). Cells were fixed 6 h post-inoculation.

#### 464 ***Viral RNA quantitation by RT-qPCR***

465 A549-ACE2 cell monolayers were inoculated at MOI = 0.001 in the presence of non-toxic  
466 concentrations of the compound. Forty-eight hours later, cell supernatants were collected and  
467 heat-inactivated as described in (Smyrlaki et al., 2020)<sup>52</sup>, and processed directly for RT-qPCR.  
468 Alternatively, cell lysates were prepared using the Trizol reagent (Thermo Scientific) and the  
469 viral RNA content was determined by RT-qPCR using previously validated sets of primers and  
470 probes specific for the detection of the SARS-CoV-2 E gene and the cellular 18S gene, for  
471 normalization purposes.  $\Delta$ Ct method was used for relative quantitation of the intracellular viral  
472 RNA accumulation in compound-treated cells compared to the levels in infected cells treated  
473 with DMSO (set as 100%).

#### 474 ***Cytotoxicity measurement by MTT assays***

475 Cell monolayers were seeded in 96-well plates. The day after cells were treated with a wide range  
476 of compound concentrations and forty-eight hours later they were subjected to an MTT assays  
477 using standard procedures<sup>53</sup>. The CC<sub>50</sub> values were graphically interpolated from dose-response  
478 curves obtained with three biological replicates.

#### 479 ***Assessment of viral entry using retroviral pseudotypes***

480 Retroviral particles pseudotyped with SARS-2-CoV spike envelope protein (Spp) were produced  
481 in HEK293T cells as previously described<sup>54</sup> with materials kindly provided by Dr. F. L. Cosset  
482 (INSERM, Lyon) and J. M. Casasnovas and J. G. Arriaza (CNB-CSIC) for the S protein cDNA.  
483 Particles devoid of envelope glycoproteins were produced in parallel as controls.

#### 484 ***Statistical Analysis***

485 Descriptive statistics were calculated using Microsoft Excel. One-way ANOVA and *post-hoc*  
486 tests were calculated using IBM SPSS Software Package (version 26). EC<sub>50</sub> and EC<sub>90</sub> values were  
487 obtained employing the PROBIT regression method<sup>55</sup> using IBM SPSS vs26.

488 Synergy analysis was carried out in the web-based platform Synergy Finder  
489 (<https://synergyfinder.fimm.fi/>)<sup>31</sup>.

#### 490 **Acknowledgements**

491 This research was funded by CSIC (PIE-RD-COVID-19 ref 202040E236 to R.S., PIE-RD-  
492 COVID-19 ref. E202020E079 to P.G and U.G, and CSIC-CoV19-153 ref PIE-202080E221 to  
493 M.G-R.). Funding from EVA (European Virus Archive; grant agreement No 871029) is gratefully  
494 acknowledge. GH. J-A. was supported by the Deutsche Forschungsgemeinschaft (Individual  
495 Research Grant JI 241/2-1).

#### 496 **References**

- 497 1. Folegatti, P. M. *et al.* Safety and immunogenicity of the ChAdOx1 nCoV-19 vaccine  
498 against SARS-CoV-2: a preliminary report of a phase 1/2, single-blind, randomised  
499 controlled trial. *Lancet* 1–13 (2020) doi:10.1016/S0140-6736(20)31604-4.
- 500 2. Grein, J. *et al.* Compassionate Use of Remdesivir for Patients with Severe Covid-19. *N.*  
501 *Engl. J. Med.* **382**, 2327–2336 (2020).
- 502 3. Li, X. *et al.* Is hydroxychloroquine beneficial for COVID-19 patients ? (2020)  
503 doi:10.1038/s41419-020-2721-8.

- 504 4. Newman, D. J. & Cragg, G. M. Marine natural products and related compounds in  
505 clinical and advanced preclinical trials. *J. Nat. Prod.* **67**, 1216–1238 (2004).
- 506 5. Jan, J. T. *et al.* Identification of existing pharmaceuticals and herbal medicines as  
507 inhibitors of SARS-CoV-2 infection. *Proc. Natl. Acad. Sci. U. S. A.* **118**, 1–8 (2021).
- 508 6. Gu, C. *et al.* Protoporphyrin IX and verteporfin potently inhibit SARS-CoV-2 infection  
509 in vitro and in a mouse model expressing human ACE2. *Sci. Bull.* (2020)  
510 doi:10.1016/j.scib.2020.12.005.
- 511 7. Wachtel-Galor, S. & Benzie, I. F. F. *Herbal Medicine: An Introduction to Its History,*  
512 *Usage, Regulation, Current Trends, and Research Needs. Herbal Medicine:*  
513 *Biomolecular and Clinical Aspects* (2011).
- 514 8. Veeresham, C. Natural products derived from plants as a source of drugs. *J. Adv. Pharm.*  
515 *Technol. Res.* **3**, 200–201 (2012).
- 516 9. Nicolaou, K. C., Guy, R. K. & Potier, P. Taxoids: new weapons against cancer. *Sci. Am.*  
517 **274**, 94–98 (1996).
- 518 10. Efferth, T., Li, P. C. H., Konkimalla, V. S. B. & Kaina, B. From traditional Chinese  
519 medicine to rational cancer therapy. *Trends Mol. Med.* **13**, 353–361 (2007).
- 520 11. Asakawa, Y. & Ludwiczuk, A. Chemical Constituents of Bryophytes: Structures and  
521 Biological Activity. *J. Nat. Prod.* **81**, 641–660 (2018).
- 522 12. Asakawa, Y., Ludwiczuk, A. & Nagashima, F. Phytochemical and biological studies of  
523 bryophytes. *Phytochemistry* **91**, 52–80 (2013).
- 524 13. Asakawa, Y., Ludwiczuk, A. & Nagashima, F. Phytochemical and biological studies of  
525 bryophytes. *Phytochemistry* **91**, 52–80 (2013).

- 526 14. Asakawa, Y., Ludwiczuk, A. & Nagashima, F. *Chemical Constituents of Bryophytes*.  
527 *Progress in the Chemistry of Organic Natural Products* vol. 1 (2013).
- 528 15. Chen, F. *et al.* Terpenoid Secondary Metabolites in Bryophytes: Chemical Diversity,  
529 Biosynthesis and Biological Functions. *CRC. Crit. Rev. Plant Sci.* **37**, 210–231 (2018).
- 530 16. Davies, K. M. *et al.* The Evolution of Flavonoid Biosynthesis: A Bryophyte Perspective.  
531 *Front. Plant Sci.* **11**, 1–21 (2020).
- 532 17. Komala, I., Ito, T., Nagashima, F., Yagi, Y. & Asakawa, Y. Cytotoxic, radical  
533 scavenging and antimicrobial activities of sesquiterpenoids from the Tahitian liverwort  
534 *Mastigophora diclados* (Brid.) Nees (Mastigophoraceae). *J. Nat. Med.* **64**, 417–422  
535 (2010).
- 536 18. Asakawa, Y., Ludwiczuk, A. & Hashimoto, T. Cytotoxic and Antiviral Compounds from  
537 Bryophytes and Inedible Fungi. *J. Pre-Clinical Clin. Res.* **7**, 73–85 (2014).
- 538 19. Wasternack, C. & Hause, B. Jasmonates: Biosynthesis, perception, signal transduction  
539 and action in plant stress response, growth and development. An update to the 2007  
540 review in *Annals of Botany*. *Ann. Bot.* **111**, 1021–1058 (2013).
- 541 20. Peñuelas, M. *et al.* Jasmonate-Related MYC Transcription Factors Are Functionally  
542 Conserved in *Marchantia polymorpha*. *Plant Cell* **31**, 2491–2509 (2019).
- 543 21. Monte, I. *et al.* Ligand-receptor co-evolution shaped the jasmonate pathway in land  
544 plants. *Nat. Chem. Biol.* **14**, 480–488 (2018).
- 545 22. Tanaka, M. *et al.* Direct evidence of specific localization of sesquiterpenes and  
546 marchantin A in oil body cells of *Marchantia polymorpha* L. *Phytochemistry* **130**, 77–84  
547 (2016).

- 548 23. Romani, F. *et al.* Oil Body Formation in *Marchantia polymorpha* Is Controlled by  
549 MpC1HDZ and Serves as a Defense against Arthropod Herbivores. *Curr. Biol.* **30**, 2815-  
550 2828.e8 (2020).
- 551 24. Rolin, D. Control of primary metabolism in plants. Annual Plant Reviews, Volume 22.  
552 *Ann. Bot.* **98**, 1331–1332 (2006).
- 553 25. Maeda, H. A. Evolutionary diversification of primary metabolism and its contribution to  
554 plant chemical diversity. *Front. Plant Sci.* **10**, 1–8 (2019).
- 555 26. Ratnoglik, S. L. *et al.* Antiviral activity of extracts from *Morinda citrifolia* leaves and  
556 chlorophyll catabolites, pheophorbide a and pyropheophorbide a, against hepatitis C  
557 virus. *Microbiol. Immunol.* **58**, 188–194 (2014).
- 558 27. Bouslama, L., Hayashi, K., Lee, J. B., Ghorbel, A. & Hayashi, T. Potent virucidal effect  
559 of pheophorbide a and pyropheophorbide a on enveloped viruses. *J. Nat. Med.* **65**, 229–  
560 233 (2011).
- 561 28. Hamre, D. & Procknow, J. J. A new virus isolated from the human respiratory tract.  
562 *Proc. Soc. Exp. Biol. Med.* **121**, 190–193 (1966).
- 563 29. Pierson, T. C. *et al.* An infectious West Nile virus that expresses a GFP reporter gene.  
564 *Front. Microbiol.* **334**, 28–40 (2005).
- 565 30. Ostertag, D., Hoblitzell-Ostertag, T. M. & Perrault, J. Overproduction of double-stranded  
566 RNA in vesicular stomatitis virus-infected cells activates a constitutive cell-type-specific  
567 antiviral response. *J. Virol.* **81**, 503–513 (2007).
- 568 31. Ianevski, A., Giri, A. K. & Aittokallio, T. SynergyFinder 2.0: visual analytics of multi-  
569 drug combination synergies. *Nucleic Acids Res.* **48**, W488–W493 (2020).



- 570 32. Ginex, T. *et al.* Host-Directed FDA-Approved Drugs with Antiviral Activity against  
571 SARS-CoV-2 Identified by Hierarchical In Silico/In Vitro Screening Methods.  
572 *Pharmaceuticals (Basel)*. **14**, (2021).
- 573 33. Asakawa, Y. Biologically active compounds from bryophytes. *Pure Appl. Chem.* **79**,  
574 557–580 (2007).
- 575 34. Chansakaow, S., Ruangrunsi, N. & Ishikawa, T. Isolation of pyropheophorbide a from  
576 the leaves of *Atalantia monophylla* (ROXB.) CORR. (Rutaceae) as a possible antiviral  
577 active principle against herpes simplex virus type 2. *Chem. Pharm. Bull. (Tokyo)*. **44**,  
578 1415–1417 (1996).
- 579 35. Ohta, S. *et al.* Anti-herpes simplex virus substances produced by the marine green alga,  
580 *Dunaliella primolecta*. *J. Appl. Phycol.* **10**, 349–356 (1998).
- 581 36. Zhang, H.-J. *et al.* Natural anti-HIV agents. Part IV. Anti-HIV constituents from *Vatica*  
582 *cinerea*. *J. Nat. Prod.* **66**, 263–268 (2003).
- 583 37. RÖDER, B., HANKE, T. H., OELCKERS, S. T., HACKBARTH, S. T. & SYMIETZ, C.  
584 H. Photophysical properties of pheophorbide a in solution and in model membrane  
585 systems. *J. Porphyrins Phthalocyanines* **04**, 37–44 (2000).
- 586 38. Drokhyansky, E., Soh, T. K. & Cepko, C. L. Preferential Budding of Vesicular  
587 Stomatitis Virus from the Basolateral Surface of Polarized Epithelial Cells Is Not Solely  
588 Directed by Matrix Protein or Glycoprotein. *J. Virol.* **89**, 11718–11722 (2015).
- 589 39. Morita, E. & Sundquist, W. I. Retrovirus budding. *Annu. Rev. Cell Dev. Biol.* **20**, 395–  
590 425 (2004).
- 591 40. De Wit, E., Van Doremalen, N., Falzarano, D. & Munster, V. J. SARS and MERS:  
592 Recent insights into emerging coronaviruses. *Nat. Rev. Microbiol.* **14**, 523–534 (2016).

- 593 41. Hirsch, A. J. *et al.* The Src family kinase c-Yes is required for maturation of West Nile  
594 virus particles. *J. Virol.* **79**, 11943–11951 (2005).
- 595 42. Meer, G. Membrane lipids, where they are and how they behave: Sphingolipids on the  
596 move. *FASEB J.* **24**, 112–124 (2010).
- 597 43. Sh Lebedeva, N., A Gubarev, Y., O Koifman, M. & I Koifman, O. The Application of  
598 Porphyrins and Their Analogues for Inactivation of Viruses. *Molecules* **25**, (2020).
- 599 44. Gu, C. *et al.* Protoporphyrin IX and verteporfin potently inhibit SARS-CoV-2 infection  
600 in vitro and in a mouse model expressing human ACE2. *Sci. Bull.* **66**, 925–936 (2021).
- 601 45. Xodo, L. E., Rapozzi, V., Zacchigna, M., Drioli, S. & Zorzet, S. The chlorophyll  
602 catabolite pheophorbide a as a photosensitizer for the photodynamic therapy. *Curr. Med.*  
603 *Chem.* **19**, 799–807 (2012).
- 604 46. Bellnier, D. A. *et al.* Clinical pharmacokinetics of the PDT photosensitizers porfimer  
605 sodium (Photofrin), 2-[1-hexyloxyethyl]-2-devinyl pyropheophorbide-a (Photochlor) and  
606 5-ALA-induced protoporphyrin IX. *Lasers Surg. Med.* **38**, 439–444 (2006).
- 607 47. Yilmaz, C. & Gökmen, V. Chlorophyll. *Encycl. Food Heal.* 37–41 (2016)  
608 doi:10.1016/B978-0-12-384947-2.00147-1.
- 609 48. Saide, A., Lauritano, C. & Ianora, A. Pheophorbide A: State of the art. *Mar. Drugs* **18**,  
610 1–12 (2020).
- 611 49. Hajri, A. *et al.* In Vitro and In Vivo Efficacy of Photofrin® and Pheophorbide a, a  
612 Bacteriochlorin, in Photodynamic Therapy of Colonic Cancer Cells. *Photochem.*  
613 *Photobiol.* **75**, 140 (2002).

- 614 50. Steinmann, E., Brohm, C., Kallis, S., Bartenschlager, R. & Pietschmann, T. Efficient  
615 trans-encapsidation of hepatitis C virus RNAs into infectious virus-like particles. *J.*  
616 *Virology*. **82**, 7034–7046 (2008).
- 617 51. Cervantes-Barragan, L. *et al.* Dendritic cell-specific antigen delivery by coronavirus  
618 vaccine vectors induces long-lasting protective antiviral and antitumor immunity. *MBio*  
619 **1**, 227 (2010).
- 620 52. Smyrlaki, I. *et al.* Massive and rapid COVID-19 testing is feasible by extraction-free  
621 SARS-CoV-2 RT-PCR. *Nat. Commun.* **11**, 4812 (2020).
- 622 53. Mosmann, T. Rapid colorimetric assay for cellular growth and survival: application to  
623 proliferation and cytotoxicity assays. *J. Immunol. Methods* **65**, 55–63 (1983).
- 624 54. García-Arriaza, J. *et al.* COVID-19 vaccine candidates based on modified vaccinia virus  
625 Ankara expressing the SARS-CoV-2 spike induce robust T- and B-cell immune  
626 responses and full efficacy in mice. *J. Virology*. (2021).
- 627 55. Cleophas, T. J. & Zwinderman, A. H. Probit Models for Estimating Effective  
628 Pharmacological Treatment Dosages (14 Tests) BT - Machine Learning in Medicine –  
629 A Complete Overview. in *Machine Learning in Medicine – A Complete Overview* (eds.  
630 Cleophas, T. J. & Zwinderman, A. H.) 347–354 (Springer International Publishing,  
631 2020).

632

633 **FIGURES**

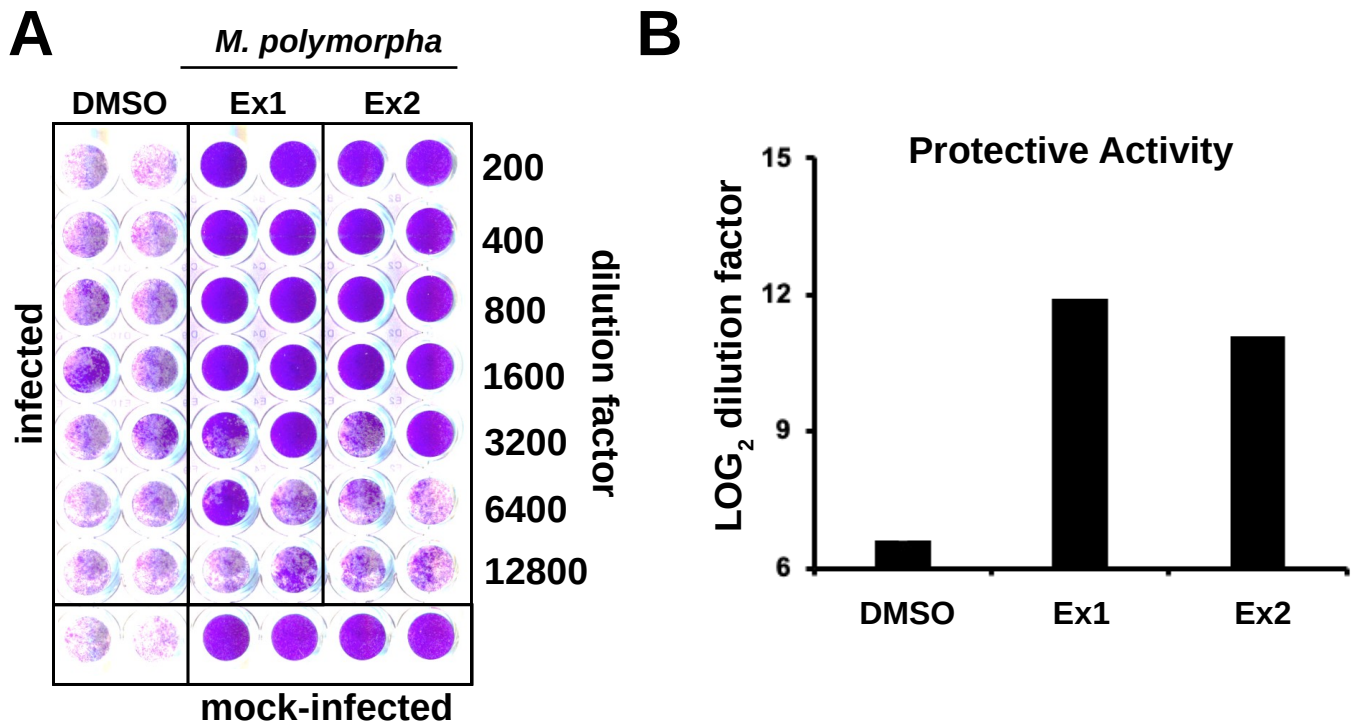

**Figure 1:** Marchantia extracts interfere with SARS-CoV-2-induced cytopathic effect. Vero E6 cells were inoculated with SARS-CoV-2 at MOI = 0.001 in the presence of serial 2-fold dilutions of crude extracts from two different Marchantia ecotypes, *ruderalis* (Ex1) and *polymorpha* (Ex2) and incubated for 72 h, time after which they were fixed and stained with a crystal violet solution. Mock-infected cells were used as the control of the integrity of the cell monolayer. A) Image of an experimental plate showing dose-dependent protection of *M. polymorpha* extracts in comparison with vehicle (DMSO)-treated cells. B) Numeric expression of the protective capacity as the log<sub>2</sub> value of the highest dilution factor capable of full-monolayer protection. Data are shown as average and mean error of two biological replicates.

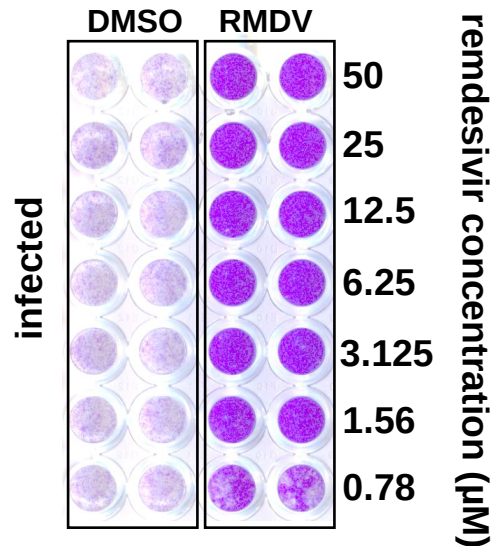

**Figure S1:** Remdesivir interferes with SARS-CoV-2-induced cytopathic effect.

Vero E6 cells were inoculated with SARS-CoV-2 at MOI = 0.001 in the presence of serial 2-fold dilutions of remdesivir (50-0.78  $\mu\text{M}$ ) and incubated for 72 h, time after which they were fixed and stained with a crystal violet solution. Representative image showing that interference with viral multiplication by remdesivir reveals its protective activity against virus-induced cytopathic effect at the expected concentrations.

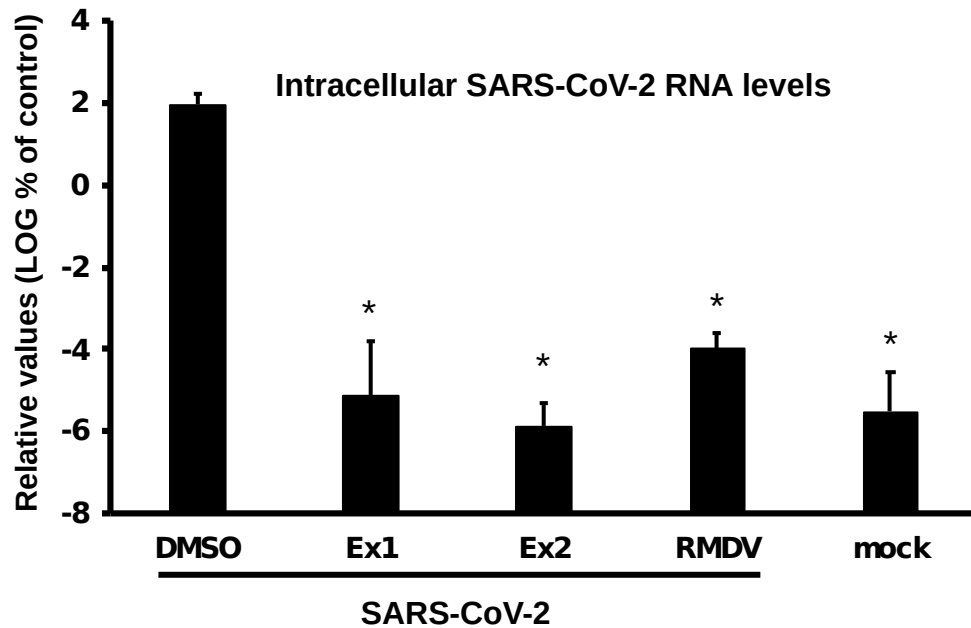

**Figure 2:** Marchantia extracts interfere with SARS-CoV-2 propagation.

Vero-E6 cells were inoculated with SARS-CoV-2 (MOI = 0.001) in the presence of vehicle (DMSO), remdesivir (RMDV; 25 $\mu$ M) or a 1:800 (v/v) dilution of crude extracts from Marchantia ecotypes, *ruderalis* (Ex1) and *polymorpha* (Ex2). Parallel samples remained uninfected as control (mock). Total RNA was extracted 72 h post-infection and subjected to RT-qPCR to determine viral load. Normalized viral RNA levels are shown as percentage of the viral RNA found in vehicle-treated cells. Data are shown as mean ( $\pm$  SD) of three biological replicates. Statistical significance was estimated using one-way ANOVA and a Dunnett's post-hoc test (\* $p$ <0.05).

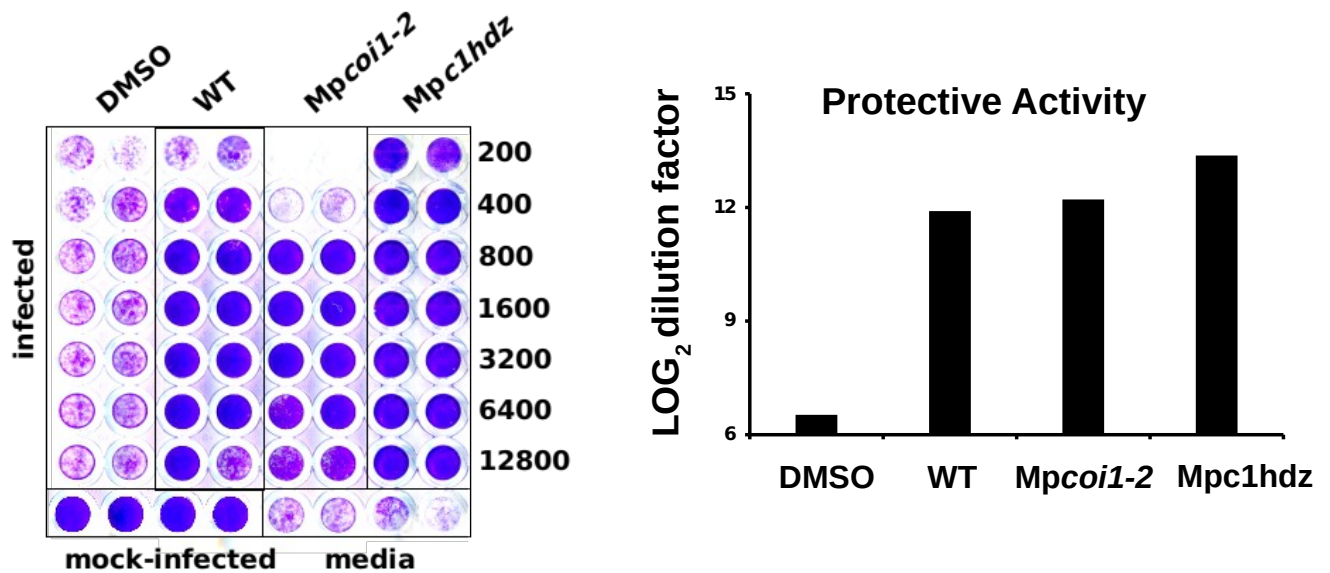

**Figure 3:** Antiviral candidates are not likely derived from *Marchantia*'s secondary metabolism. Vero E6 cells were inoculated with SARS-CoV-2 (MOI = 0.001) in the presence of serial 2-fold dilutions of crude extracts from WT, *Mpcoi1-2* or *Mpc1hdz* *Marchantia* plants. Cultures were incubated for 72 h, time after which they were fixed and stained with a crystal violet solution. Mock-infected cells were used as the control of the integrity of the cell monolayer. A) Representative experiment showing dose-dependent protection of plant extracts in comparison with vehicle (DMSO)-treated cells. B) Numeric expression of the protective capacity as the log<sub>2</sub> value of the highest dilution factor capable of full monolayer protection. Data are shown as average ( $\pm$  mean error) of two biological replicates.

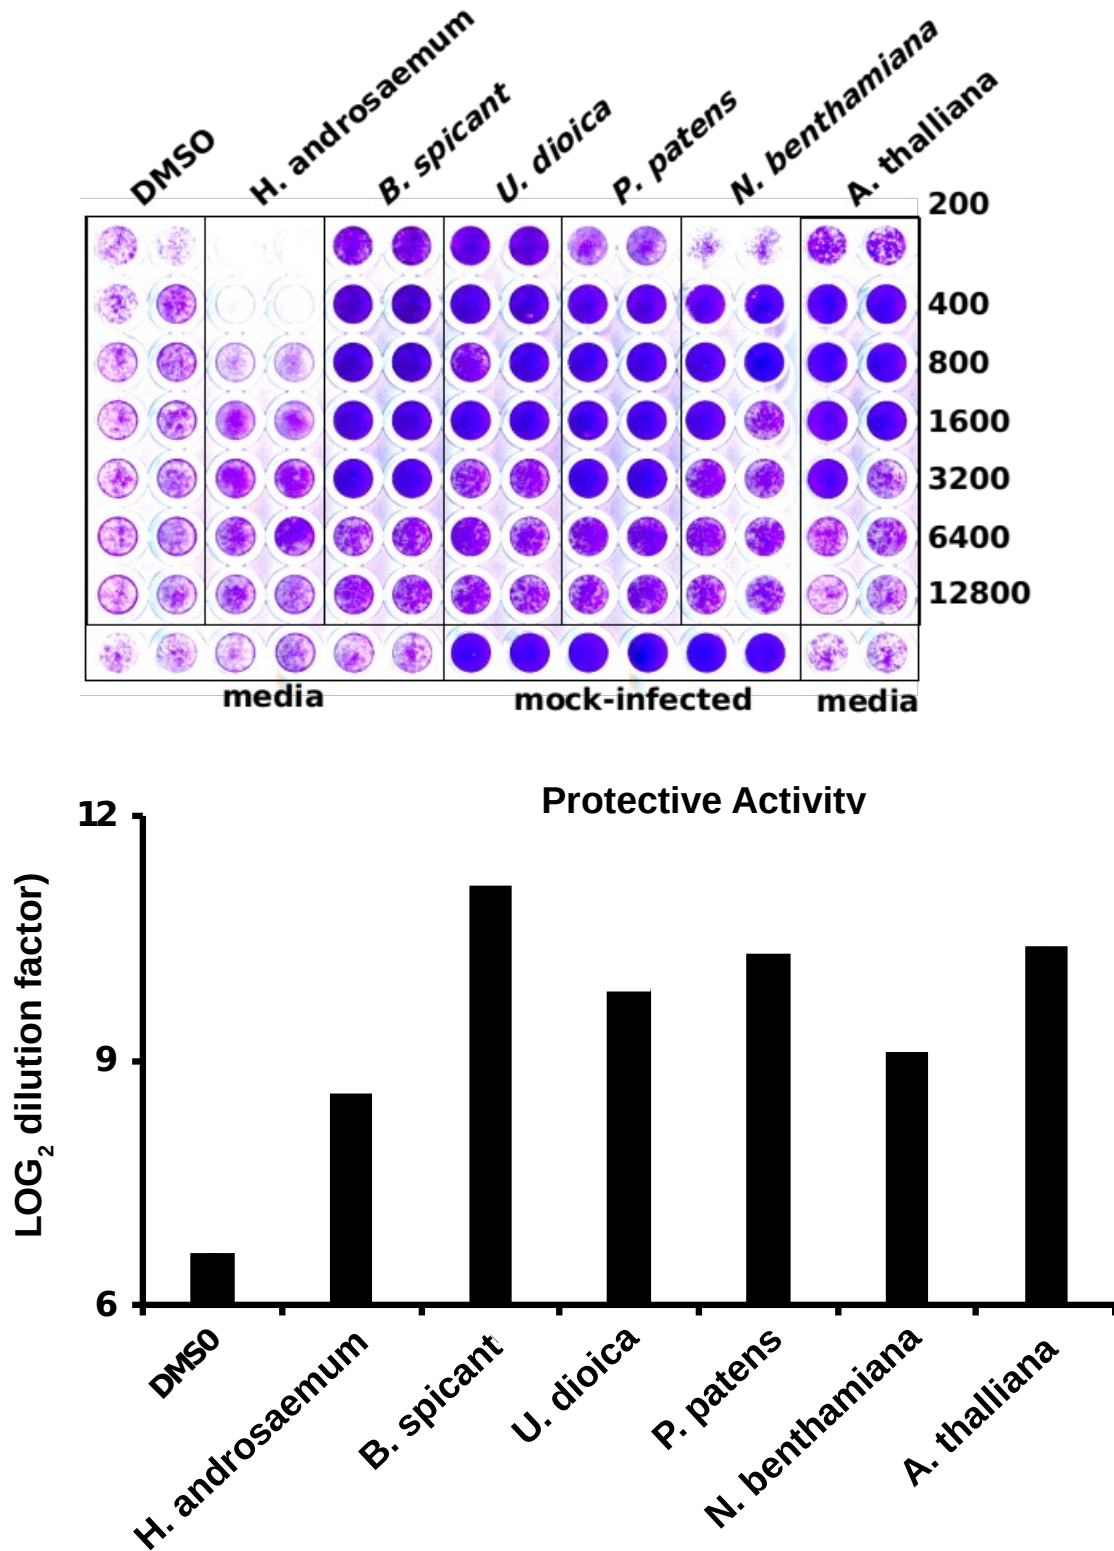

**Figure S2:** Crude extracts of several plant species show antiviral potential against SARS-CoV-2 infection in cell culture.

Vero E6 cells were inoculated with SARS-CoV-2 at MOI of 0.001 in the presence of serial 2-fold dilutions of crude extracts from sweet amber (*Hypericum androsaemum*), fern (*Blechnum spicant*), nettle (*Urtica dioica*), moss (*Physcomitrium patens*), tobacco (*Nicotiana benthamiana*), thale cress (*Arabidopsis thaliana*). Cultures were incubated for 72 h, time after which they were fixed and stained with a crystal violet solution. Mock-infected cells were used as a control of the integrity of the cell monolayer. A) Image of an experimental plate showing the dose-dependent protection of plant extracts in comparison with vehicle (DMSO)-treated cells. B) Numeric expression of the protective capacity as the log<sub>2</sub> value of the highest dilution factor capable of full monolayer protection. Data are shown as average and mean error of two biological replicates.



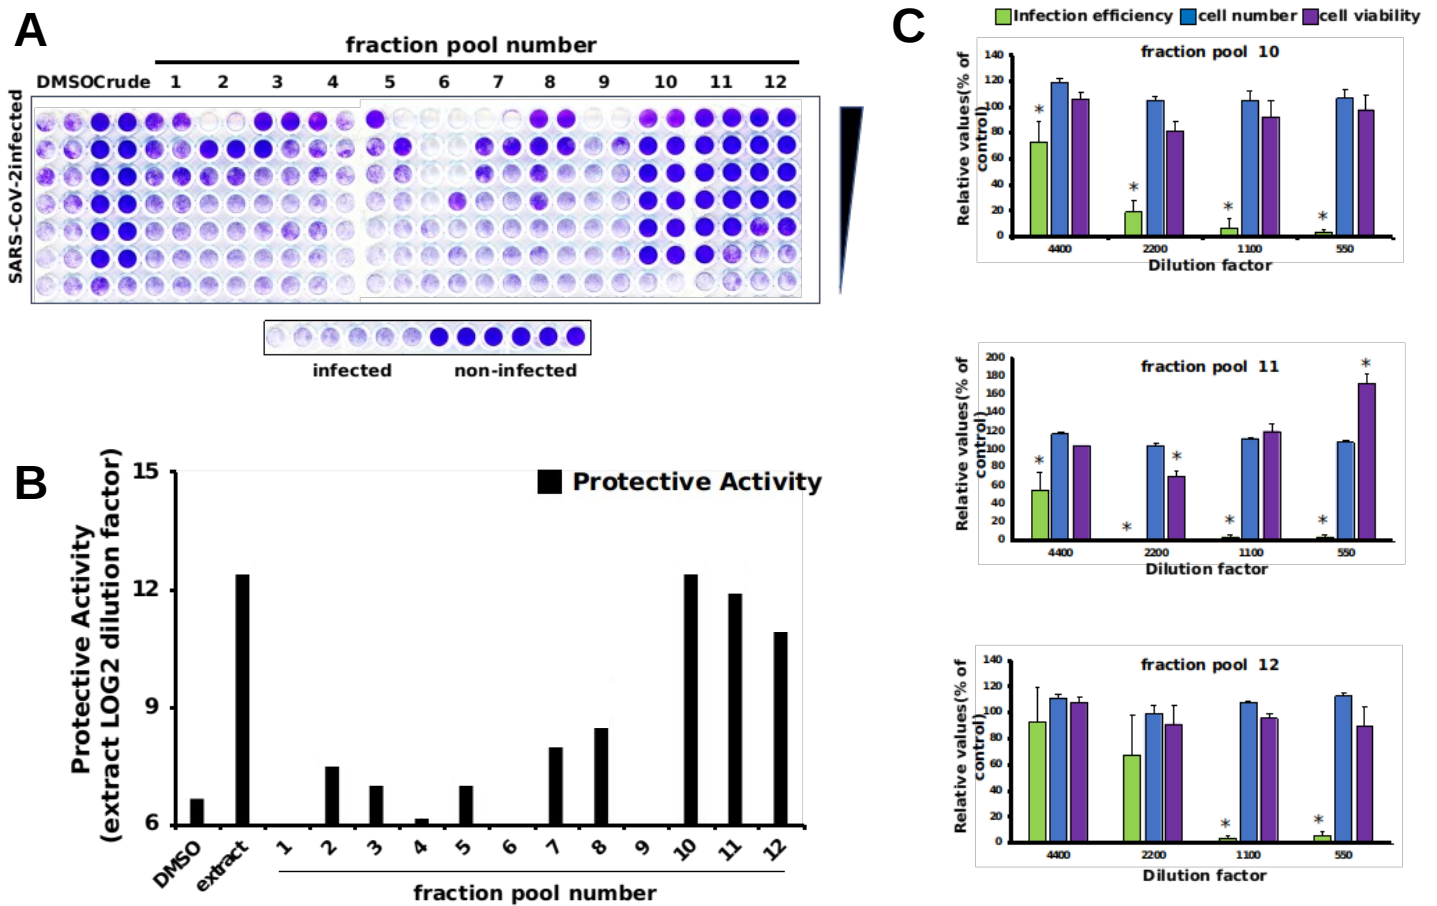

**Figure 4:** Extract fractionation and identification of antiviral fraction pools.

Vero E6 cells were inoculated with SARS-CoV-2 (MOI = 0.001) in the presence of serial 2-fold dilutions of vehicle (DMSO), a crude *Marchantia* and the fraction pools. Inoculated cultures were incubated for 72 h, time after which they were fixed and stained with a crystal violet solution. Mock-infected cells were used as the control of the integrity of the cell monolayer (non-infected). A) Experimental plates showing cell monolayer integrity (purple) in the presence of fractions containing the antiviral compound(s). B) Numeric expression of the protective capacity as the log<sub>2</sub> value of the highest dilution factor capable of full monolayer protection. Data are shown as average and mean error of two biological replicates. C) Vero E6 cells were inoculated (MOI = 0.01) in the presence of the indicated fraction dilutions and incubated for 24 h before fixation and processing for immunofluorescence microscopy and cytotoxicity assays as described in the materials and methods section. Data are shown as average ( $\pm$  SD) of three biological replicates. Statistical significance was estimated using one-way ANOVA (Dunnett's post-hoc test,  $p < 0.05$ ).

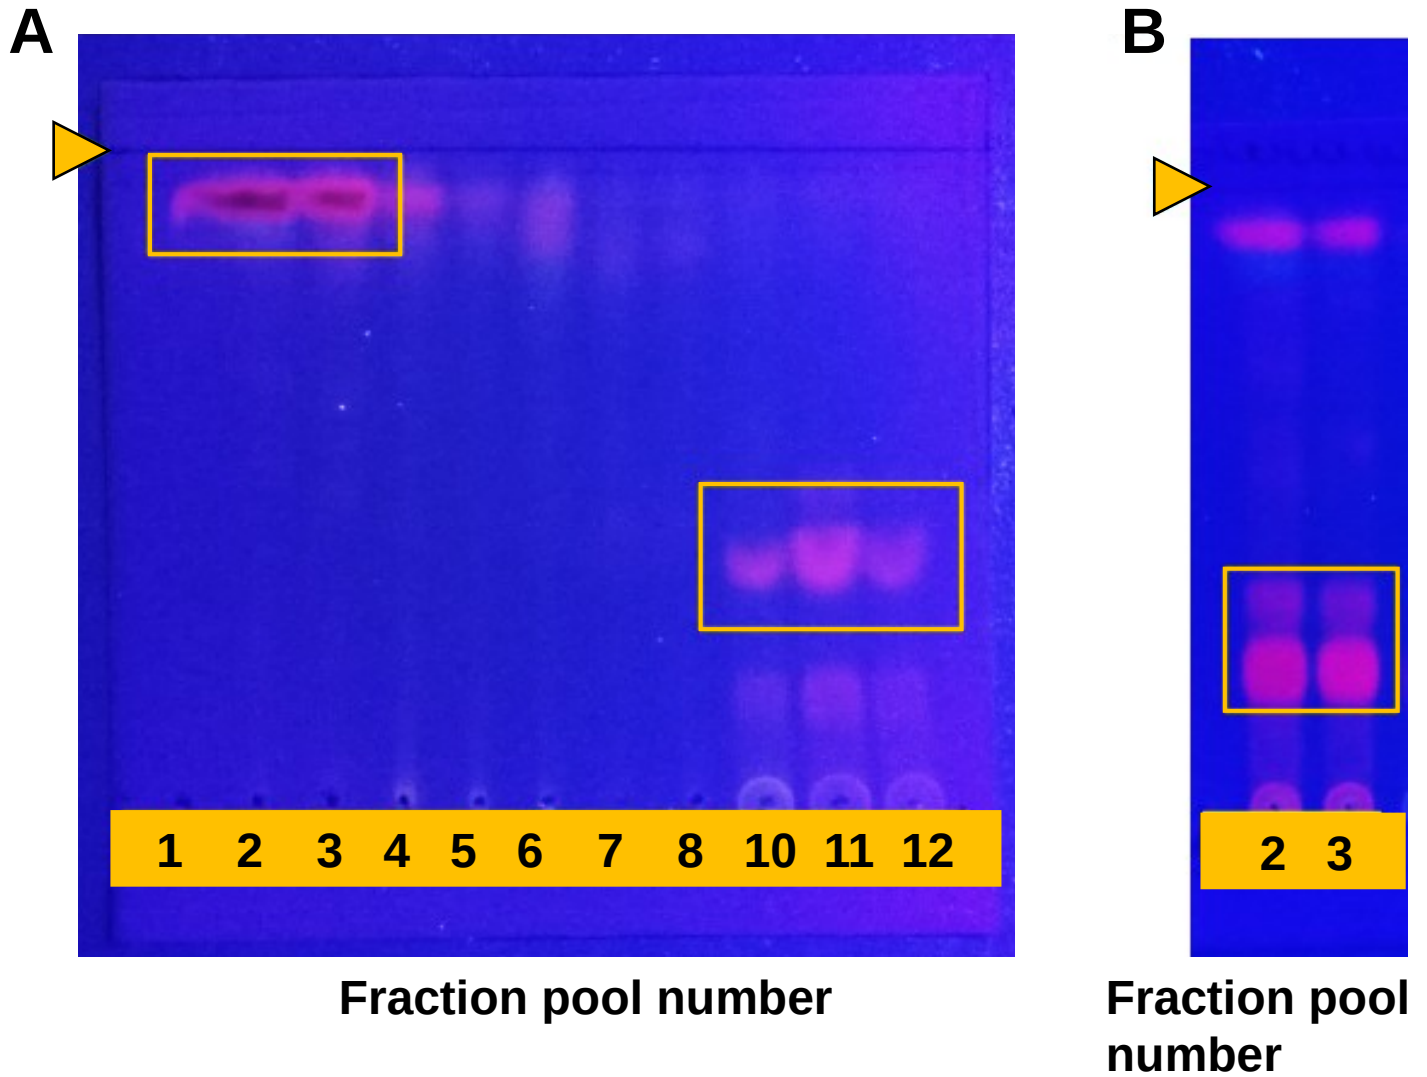

**Figure S3:** A) TLC plate of chromatographic fractions under long wave ultraviolet light (365 nm). B) TLC of chlorophyll containing fractions after heating. Red fluorescent spots, characteristic of plant chlorophylls are squared. Solvent system AcOEt:MeOH (9:1, v/v). arrows heads depict the solvent front.

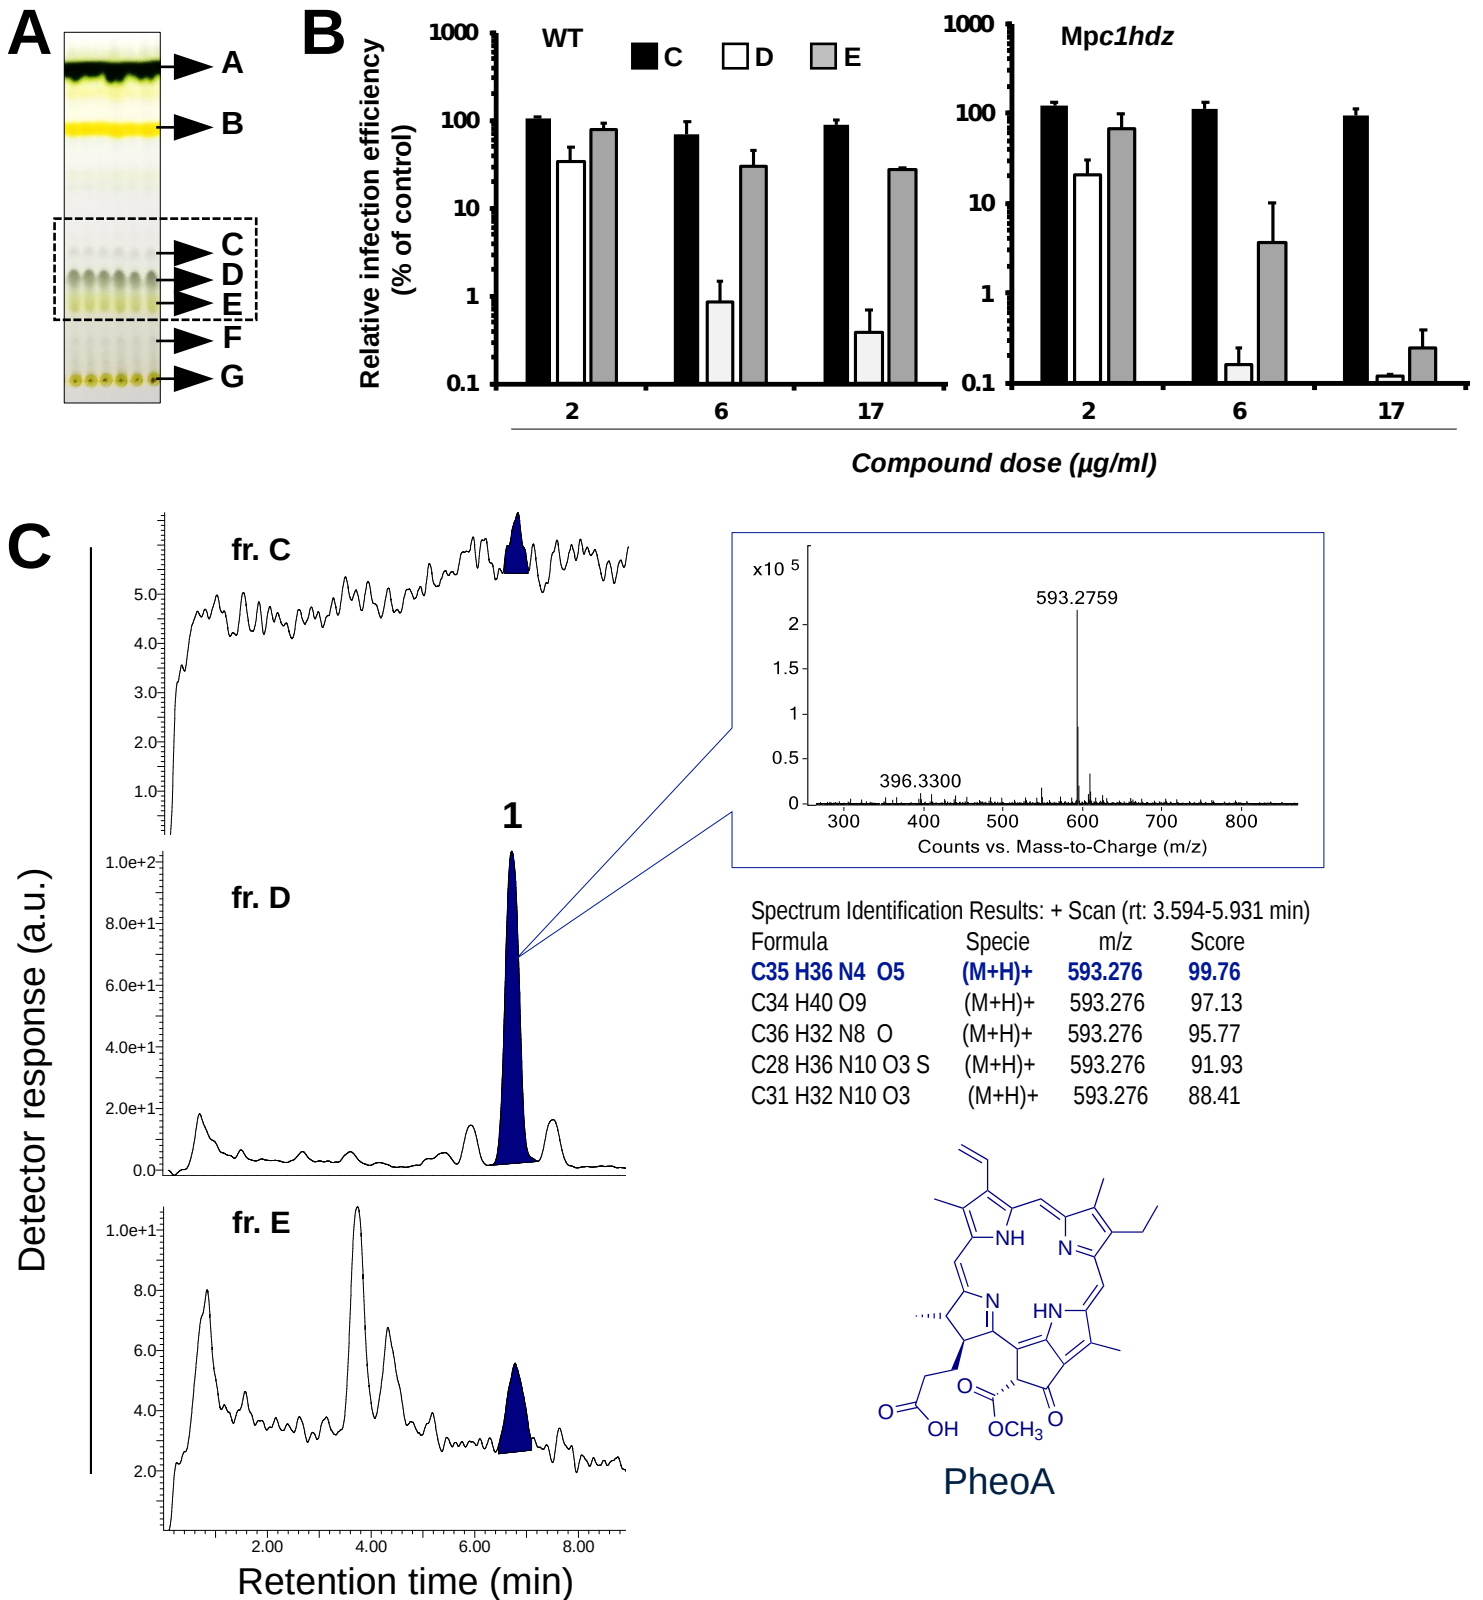

**Figure 5:** Identification of the main antiviral molecule present in *Marchantia* extracts. A) Representative TLC of WT and *Mpc1hdz* *Marchantia* extracts. Compounds C, D and E (box) were tested for their antiviral potential. B) Vero E6 cells were inoculated (MOI = 0.01) in the presence of the indicated compounds and incubated for 24 h before fixation and processing for immunofluorescence microscopy. Data are shown as average and SD of three biological replicates. Statistical significance was estimated using one-way ANOVA and a Dunnett's post-hoc test (\* $p < 0.05$ ). C) Representative HPLC/MS analysis (shown for WT) of the C, D, E compounds, including exact mass determination of the antiviral candidate **1** and the inferred chemical structure.

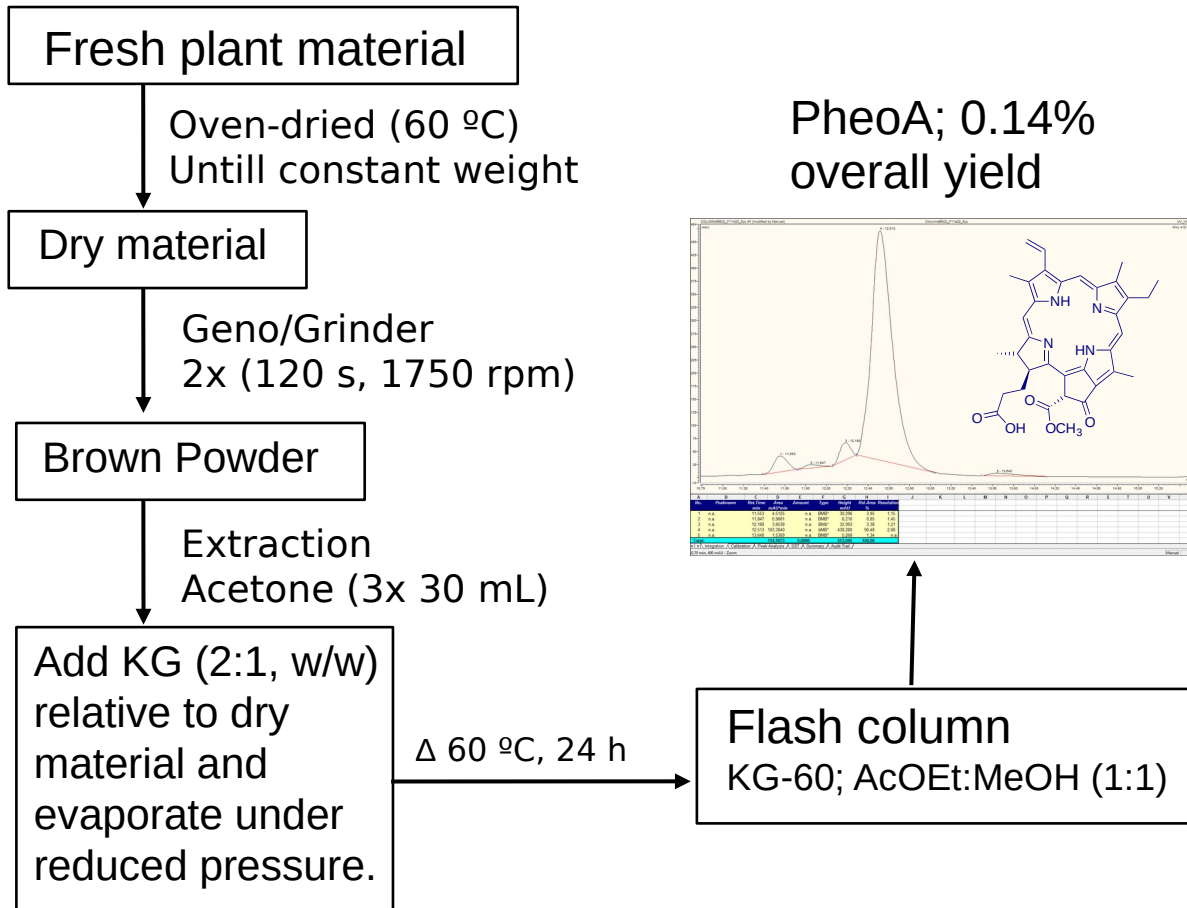

**Figure S4:** Scheme of Pheophobide a preparation from plant material. KG, Silica gel 60. AcOEt, ethyl acetate. MeOH, methanol.

## Vero-E6

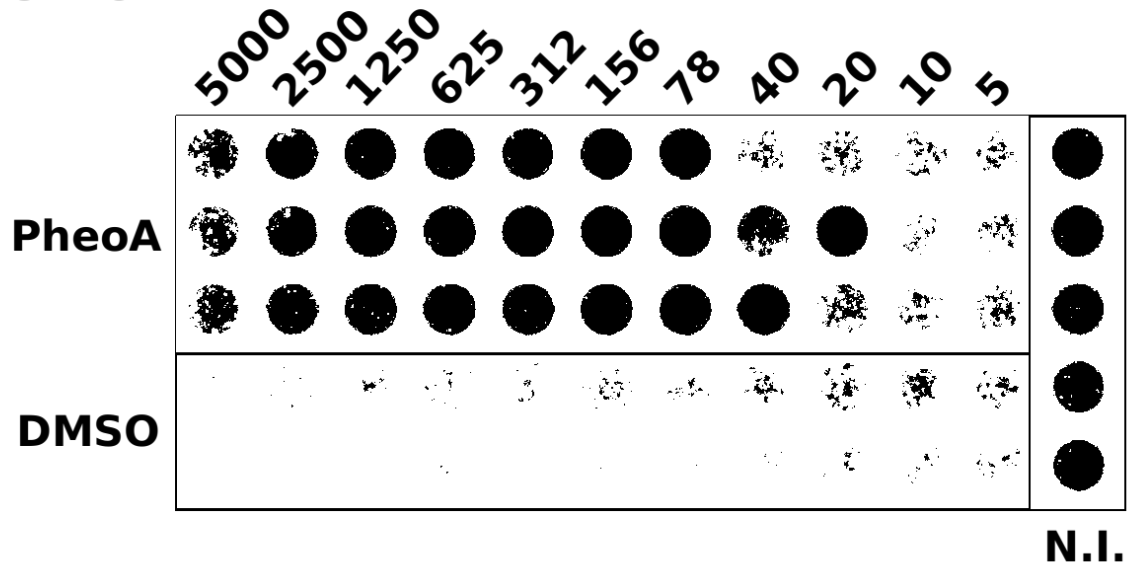

## Huh7-ACE2

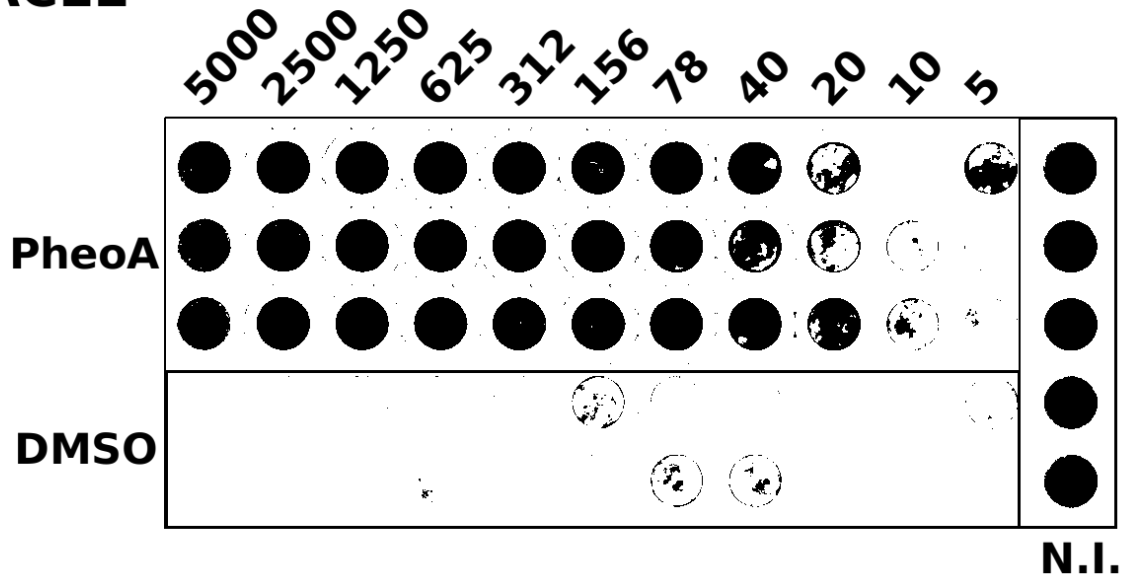

**Figure S5:** Pheophorbide a protects Vero-E6 and human hepatoma Huh7 cells from virus-induced cytopathic effect.

Vero-E6 or Huh7 cells were inoculated with SARS-CoV-2 at MOI = 0.001 in the presence of the indicated PheoA concentrations. Cultures were incubated for 72 h, time after which they were fixed and stained with a crystal violet solution. Mock-infected (N.I.) cells were used as a control of the integrity of the cell monolayer.

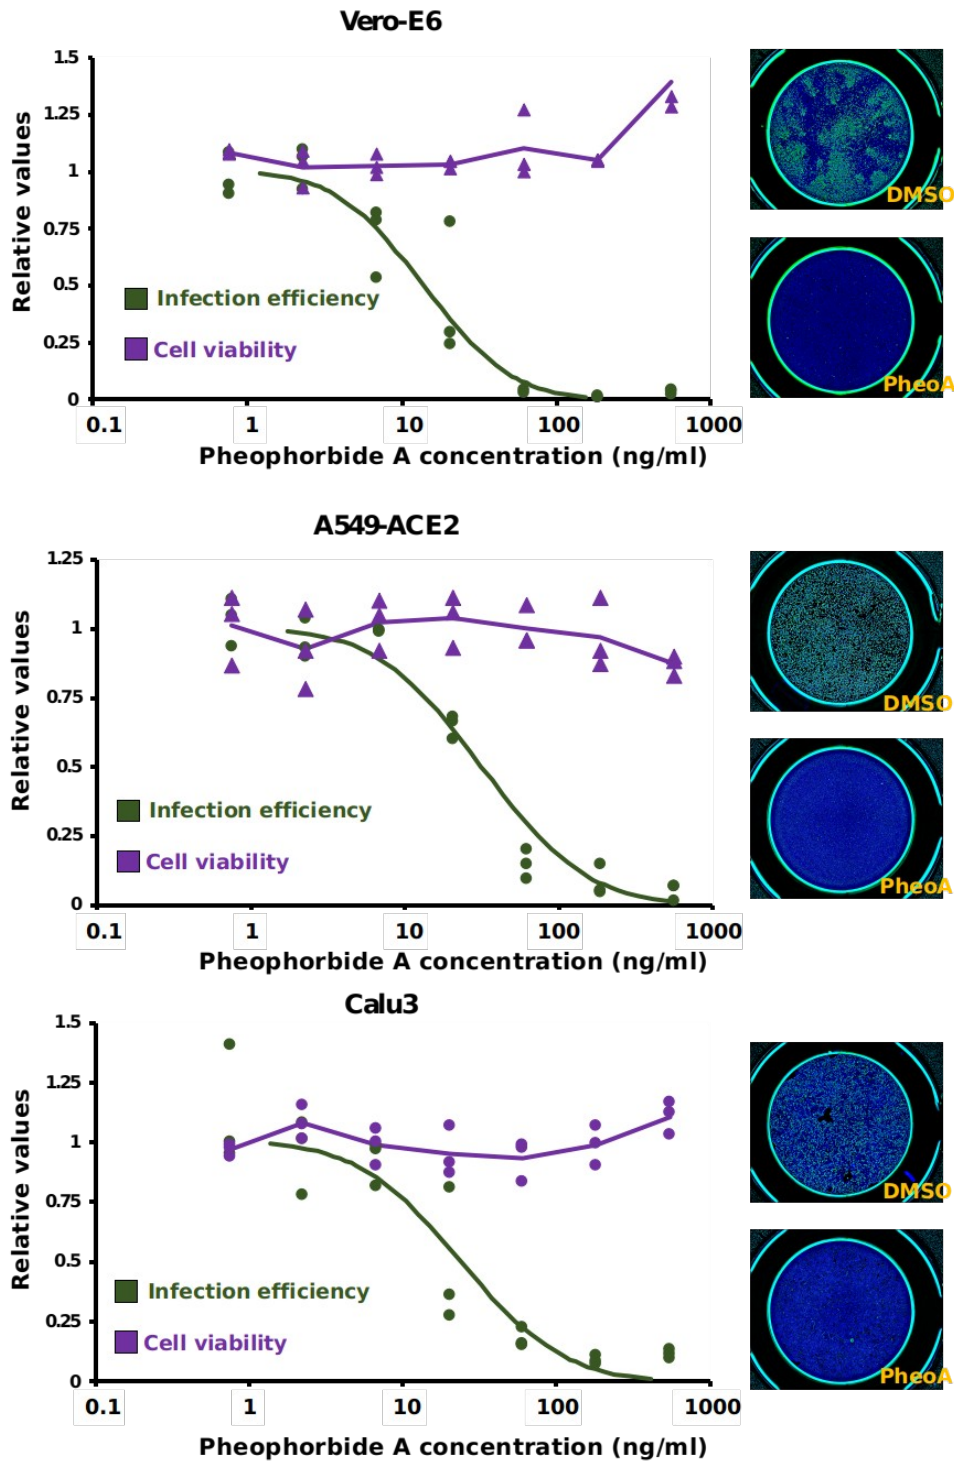

**Figure 6:** Pheophorbide A shows antiviral activity against SARS-CoV-2 in Vero E6 cells and human lung epithelial A549-ACE2 and Calu3 cell lines.

Commercially available PheoA was serially diluted and mixed (1:1) with SARS-CoV-2 preparations to achieve the indicated compound concentrations and a final MOI of 0.005 for Vero E6 and Calu3 and 0.01 for A549-ACE2 cells. Cultures were incubated for 48 h, fixed and processed for automated immunofluorescence microscopy analysis. Parallel, uninfected cultures were processed for cytotoxicity evaluation using an MTT assay. Relative infection efficiency data (N=3 per dose) are shown as individual data and a PROBIT regression curve (green line) using the represented values. Cytotoxicity data (N=3 per dose) are shown as the individual data and a moving average trendline.

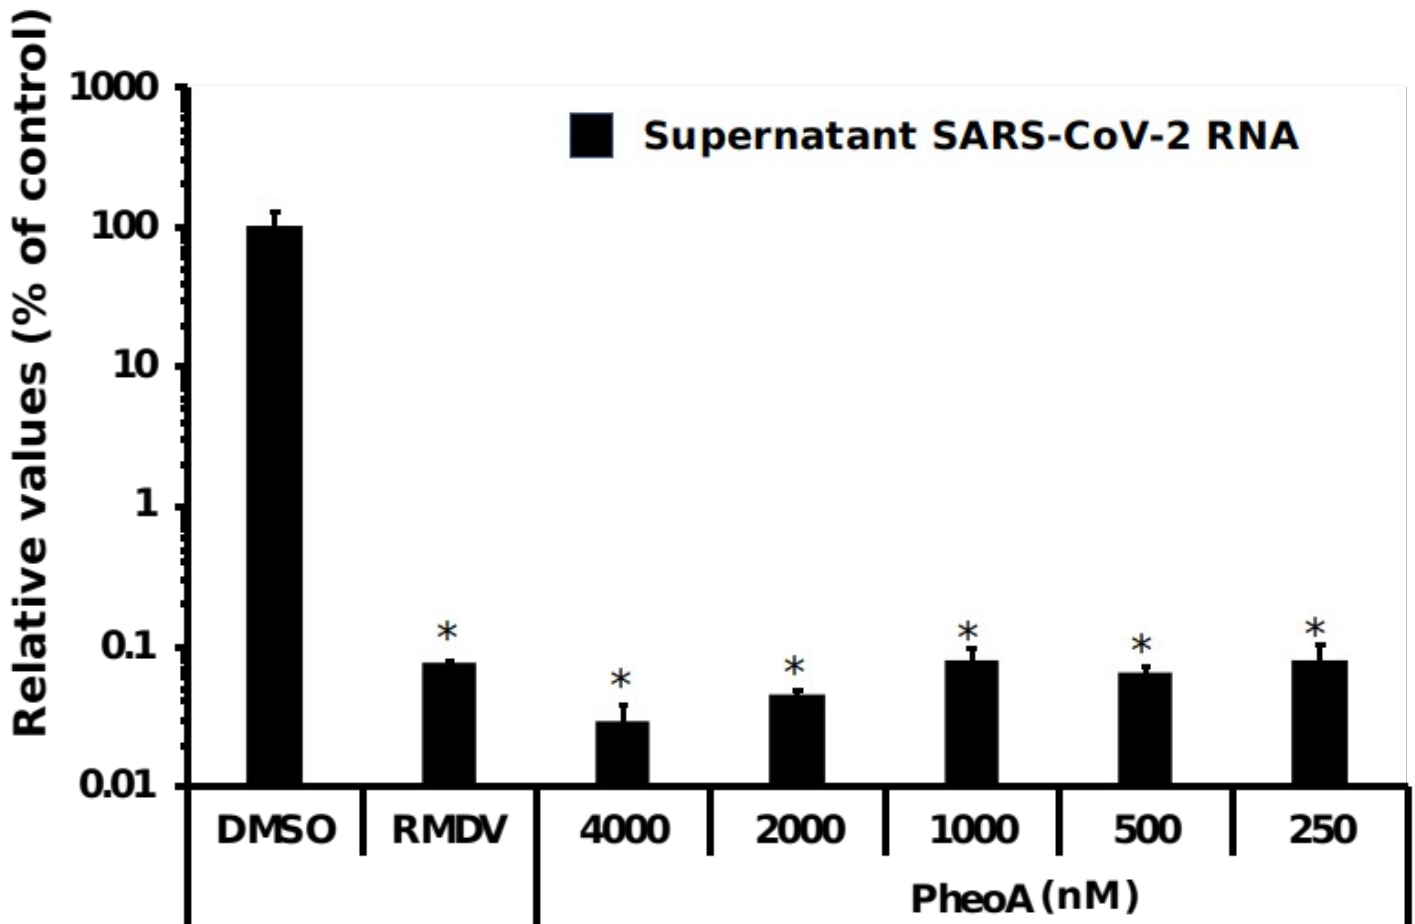

**Figure 7:** Pheophorbide A interferes with viral propagation in human cell lines as determined by RT-qPCR.

A549-ACE2 cells were inoculated at MOI = 0.01 in the presence of increasing concentrations of PheoA or 5000 nM remdesivir and incubated for 48 h. Samples of the supernatants were collected, heat-inactivated and directly subjected to RT-qPCR to estimate overall infection efficiency. Data are expressed as relative values compared with the vehicle (DMSO)-treated cells and are shown as mean and standard deviation of three biological replicates (N=3). Statistical significance was estimated using one-way ANOVA and a Dunnett's post-hoc test (\* $p < 0.05$ ).

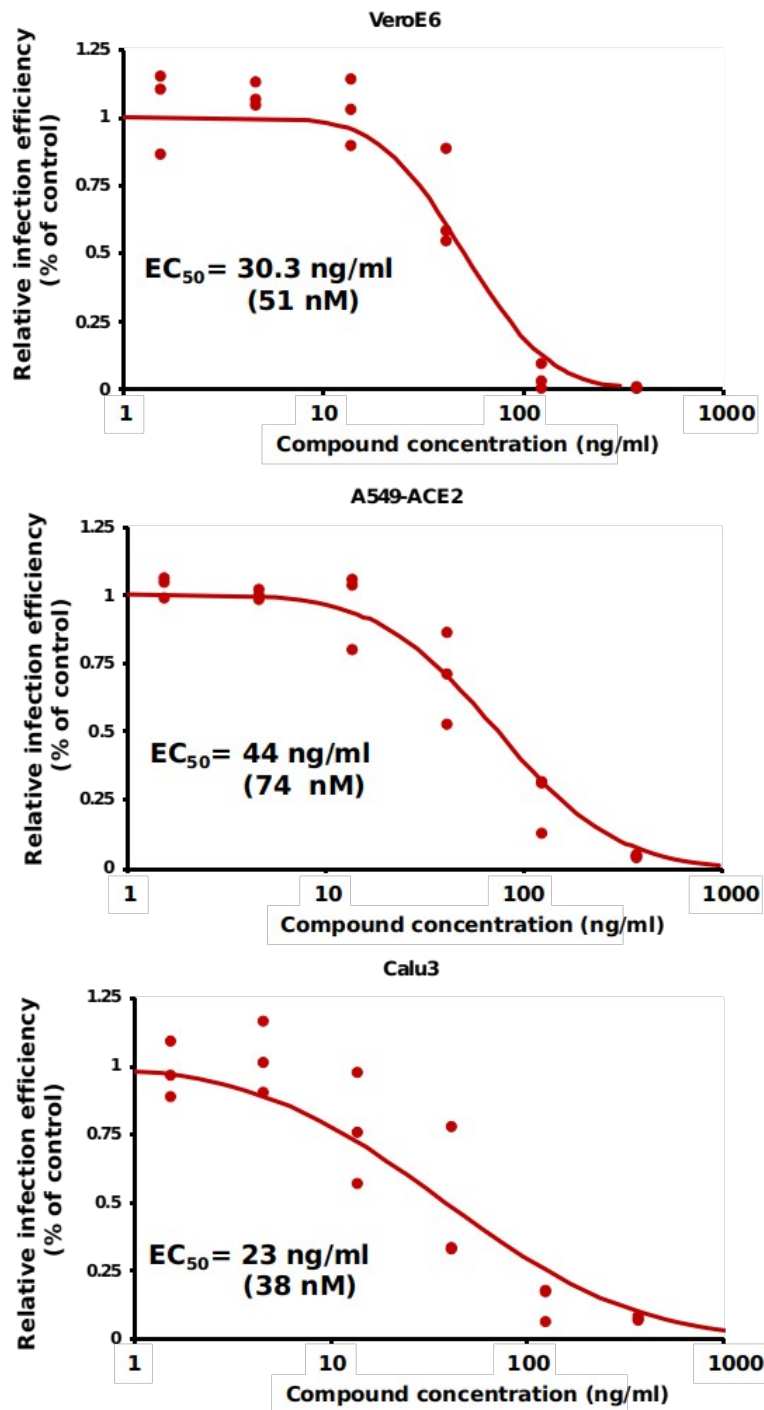

**Figure S6:** Semi-synthetic PheoA preparations display antiviral activity against SARS-CoV-2. Semi-synthetic PheoA was produced as described in Figure S4, serially diluted and mixed 1:1 with SARS-CoV-2 preparations to achieve the indicated compound concentrations and a final multiplicity of infection of 0.005 for Vero-E6 and Calu3, and 0.01 for A549-ACE2 cells. Cultures were incubated for 48 h, fixed and processed for automated immunofluorescence microscopy analysis. Relative infection efficiency data (N=3 per dose) are shown as individual data and a PROBIT regression curve (green line) using the represented values.



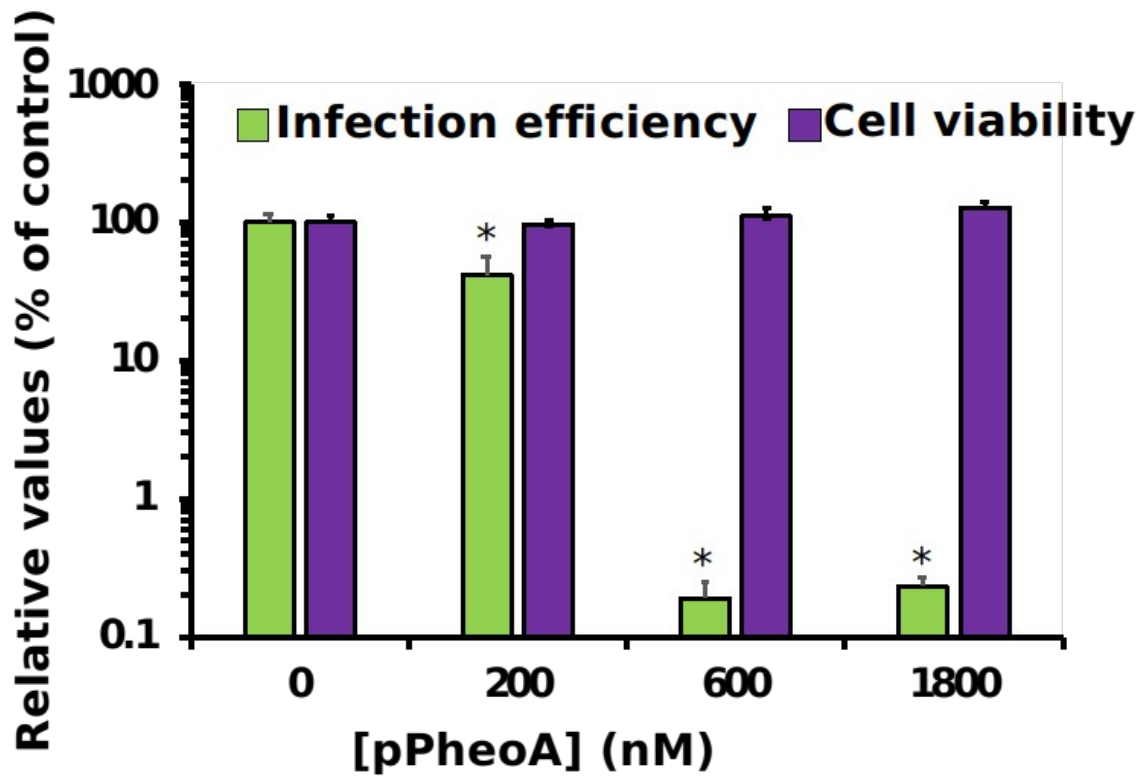

**Figure S7:** Pyropheophorbide a displays antiviral activity against SARS-CoV-2. Commercially available pPheoA was serially diluted and mixed 1:1 with SARS-CoV-2 preparations to achieve the indicated compound concentrations and a final multiplicity of infection of 0.005 for Vero E6 and Calu3, and 0.01 for A549-ACE2 cells. Cultures were incubated for 48 h, fixed and processed for automated immunofluorescence microscopy analysis. Relative infection efficiency data (N=3 per dose) are shown as individual data and a PROBIT regression curve (green line) using the represented values.

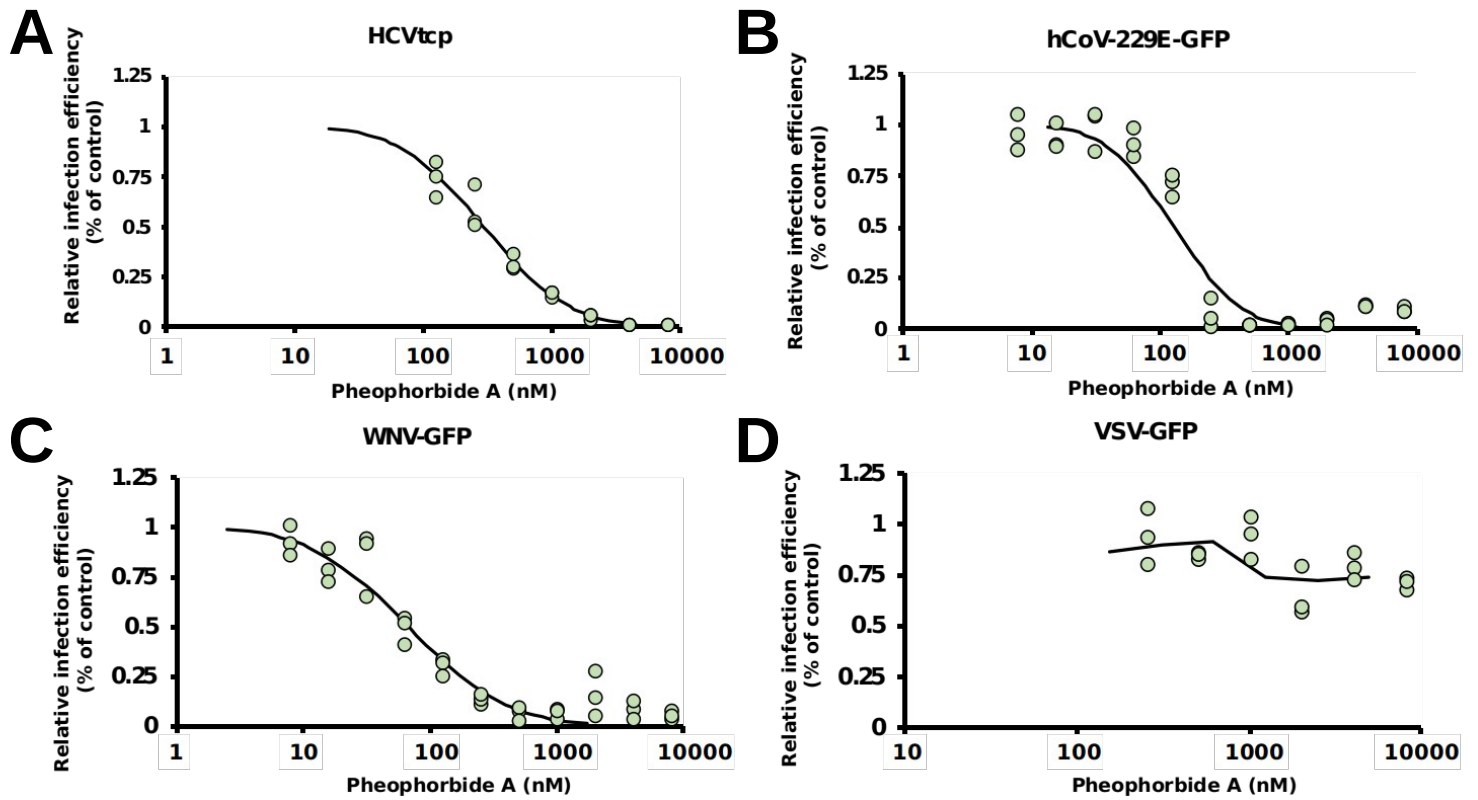

**Figure 8:** Antiviral spectrum of PheoA against different RNA viruses.

The effectiveness of PheoA was tested against four different viruses recombinant RNA viruses expressing GFP. Briefly, cells were inoculated in the presence of increasing concentrations of PheoA at MOI 0.01 and incubated to enable virus propagation. At the endpoint, cells were fixed and counter-stained with DAPI to control for unexpected cytotoxic effects. Relative infection efficiency was estimated using automated microscopy and is expressed as percentage of the infection efficiency observed in control wells. A) ..... is missing. B) Huh7 cells were infected with hCoV-229E-GFP and fixed 48 h post-inoculation. C) Huh7 cells were infected with WNV-GFP and fixed 48 h post-inoculation. D) A549-ACE2 cells were inoculated with VSV-GFP and fixed 16 h post-inoculation. Individual replicate data are shown as green dots (N=3) and the PROBIT regression curve used to estimate  $EC_{50}$  values is shown.

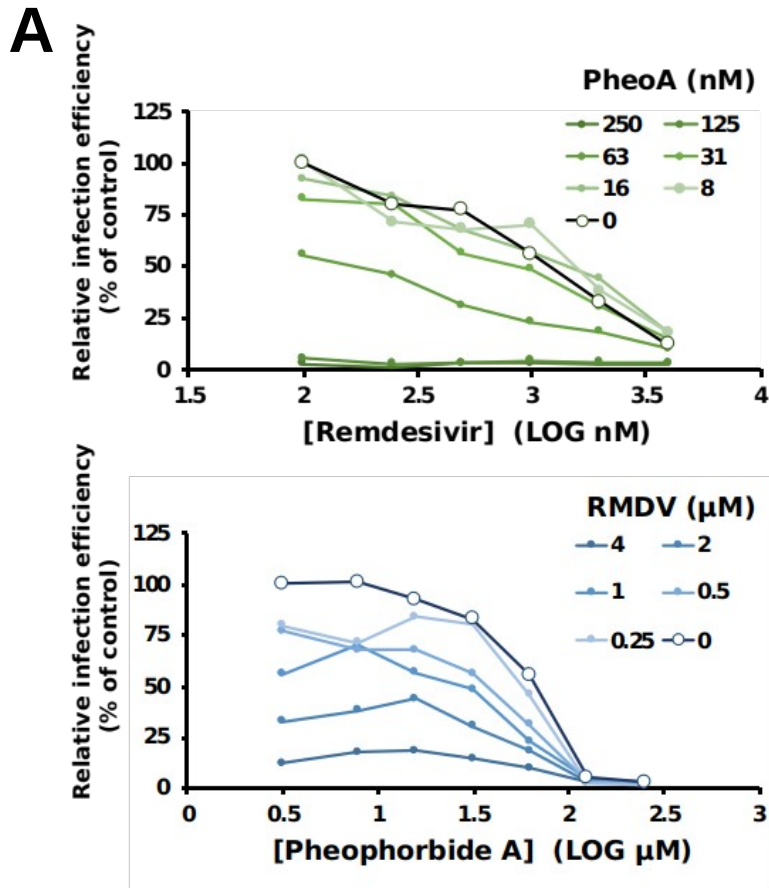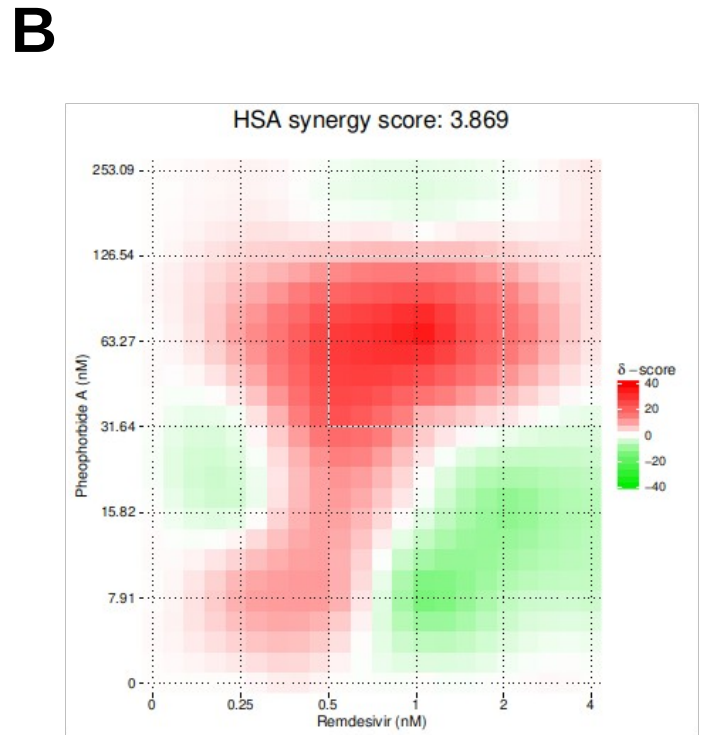

**Figure 9:** Combination treatment of Pheophorbide a with remdesivir.

Vero E6 cells were inoculated at MOI = 0.005 in the presence of increasing concentrations of PheoA in combination with increasing doses of remdesivir. Twenty-four hours post infection, cells were fixed and processed for automated immunofluorescence microscopy. Relative infection efficiency values were estimated as percentage of the values obtained in mock-treated cells. A) Data are shown as average of two biological replicates. B) Heatmap describing the areas of synergy within the combination treatments.

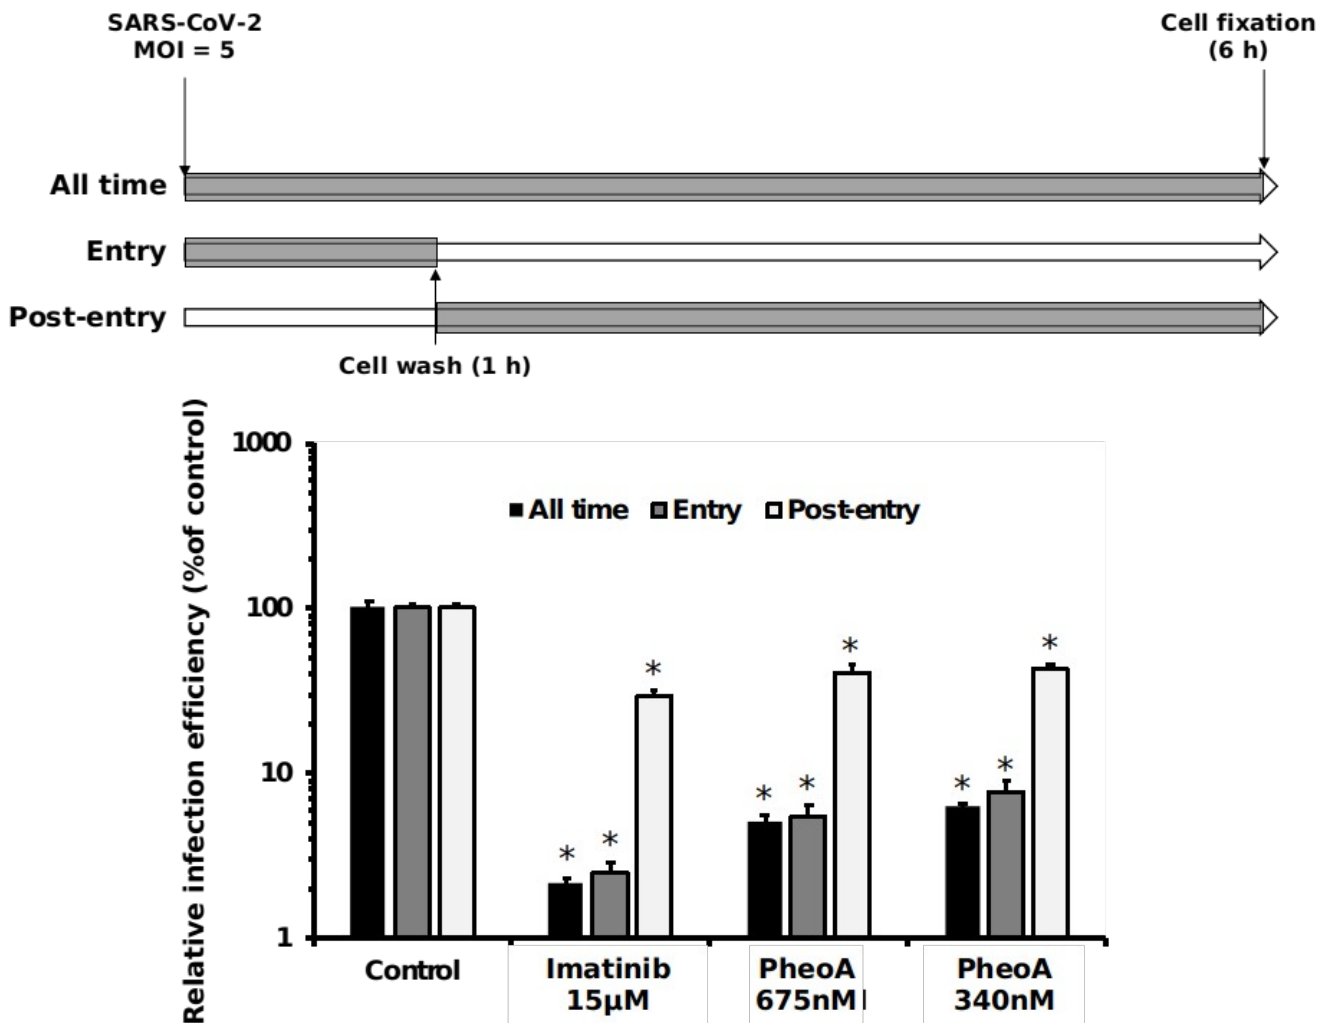

**Figure 10:** Time-of-addition experiments indicate that PheoA interferes with early aspects of SARS-CoV-2 infection.

Vero E6 cells were inoculated at MOI = 5 in the presence (gray) or absence (white) of the indicated doses of PheoA or imatinib as described in both the text and the scheme. Cells were incubated for 6 h in the presence (gray) or absence (white) before chemical fixation and processing for immunofluorescence microscopy. Infection efficiency is expressed as the percentage of that observed in vehicle DMSO-treated cells and is shown as average and standard deviation of three biological replicates (N=3). Statistical significance was estimated using one-way ANOVA and a Dunnett's post-hoc test (\* $p < 0.05$ ).

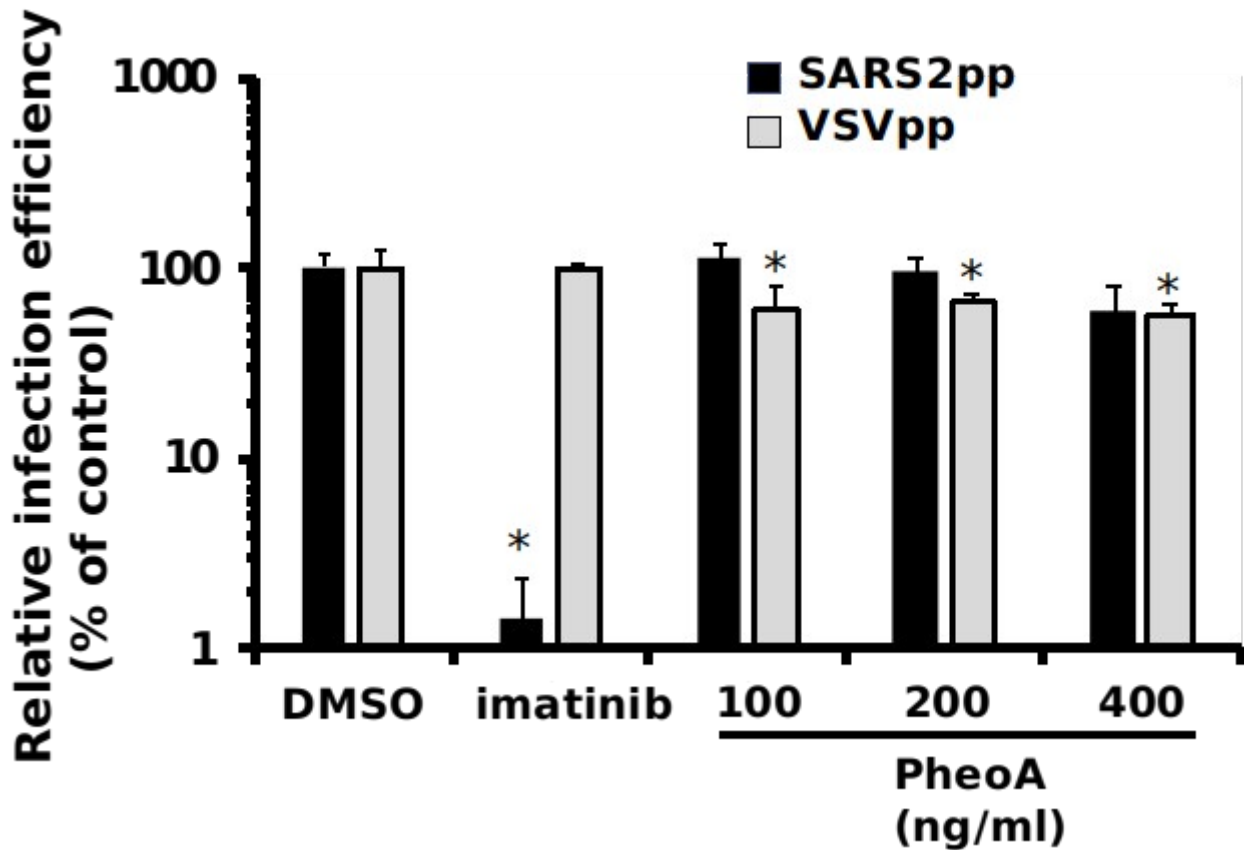

**Figure 11:** SARS-CoV-2-pseudotyped retroviral vectors (Spp) are not susceptible to PheoA antiviral activity.

Vero E6 cells were inoculated with retroviral pseudotypes bearing the SARS-CoV-2 Spike (SARS2pp) or the VSV-G glycoprotein (VSVpp) in the presence of the indicated compound concentrations. Forty-eight hours post-infection, cells were lysed and infection efficiency was estimated by the luciferase reporter gene activity. Relative infection values were calculated as percentage of the luciferase activity observed in vehicle (DMSO)-treated cells and is shown as average and standard deviation of three biological replicates (N=3). Statistical significance was estimated using one-way ANOVA and a Dunnett's post-hoc test (\*p<0.05).

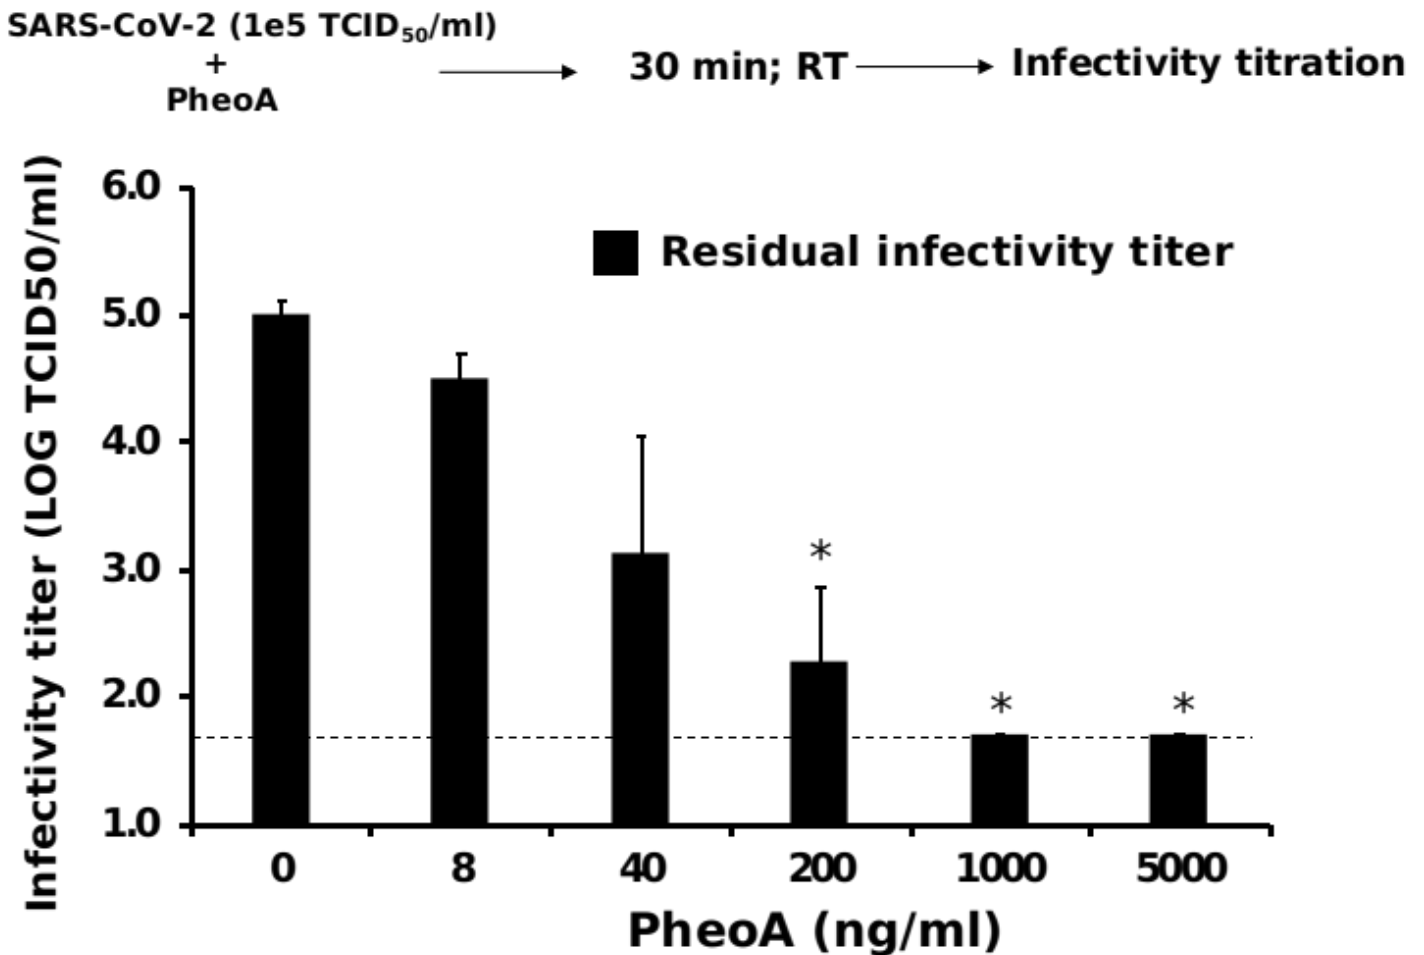

**Figure 12:** Pheophorbide A shows virucidal activity against SARS-CoV-2.

SARS-CoV-2 virus stocks were diluted to obtain  $1 \times 10^5$  TCID<sub>50</sub>/mL and were mixed with increasing concentrations of PheoA or the vehicle (DMSO). Virus-compound mixtures were incubated at room temperature for 30 minutes and were serially diluted to determine the remaining infectivity titer using endpoint dilution and determination of virus-induced cytopathic effect by crystal violet staining. Values are expressed as LOG TCID<sub>50</sub>/mL and shown as the average and standard deviation of three independent experiments (N=3). Statistical significance was estimated using one-way ANOVA and a Dunnett's post-hoc test (\* $p < 0.05$ ).
